# Supplementary material
Source: PubMed Central journal article supplement (PMC3553759)
Supplement: AEM.03107-12_zam999104008so1.pdf [file AEM.03107-12_zam999104008so1.pdf]

Fig. S1a - Sample level rarefaction

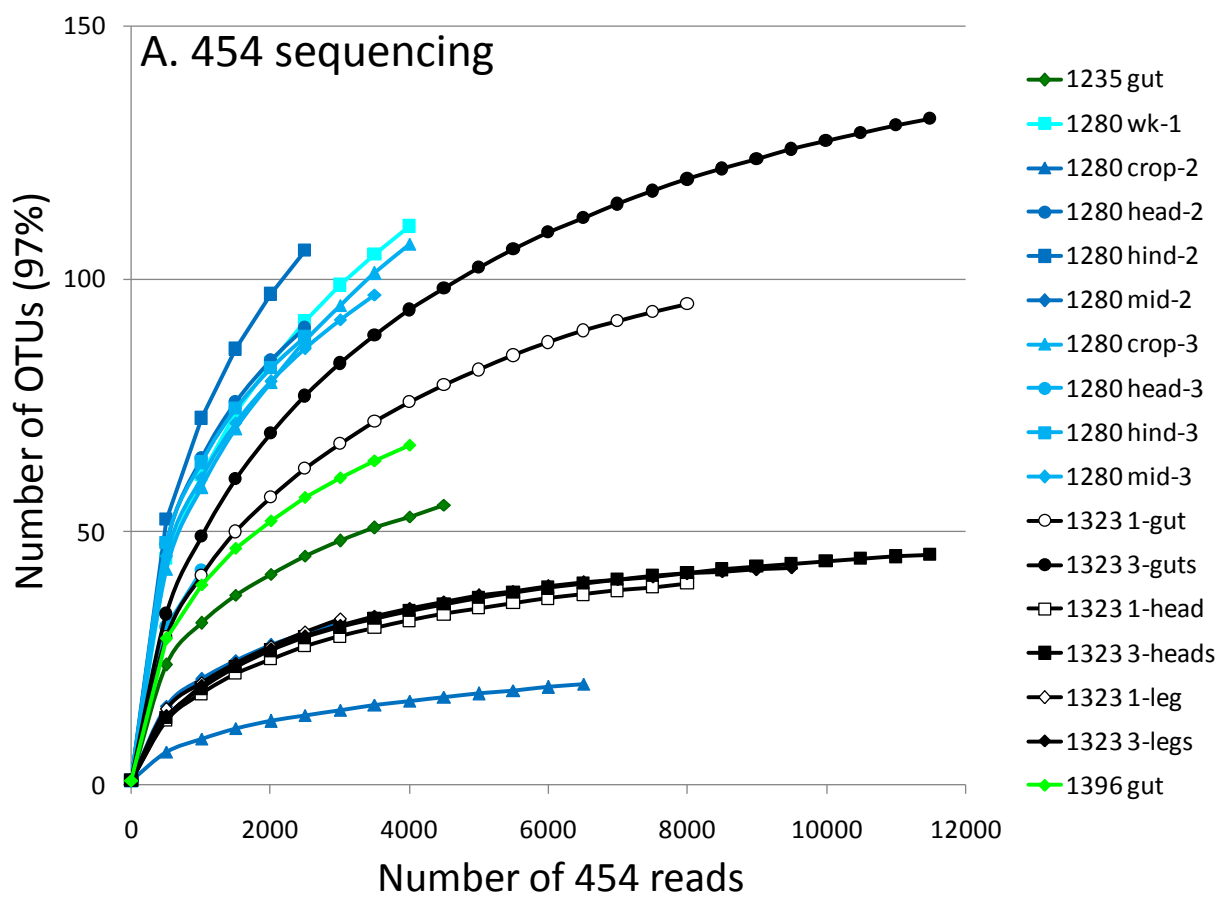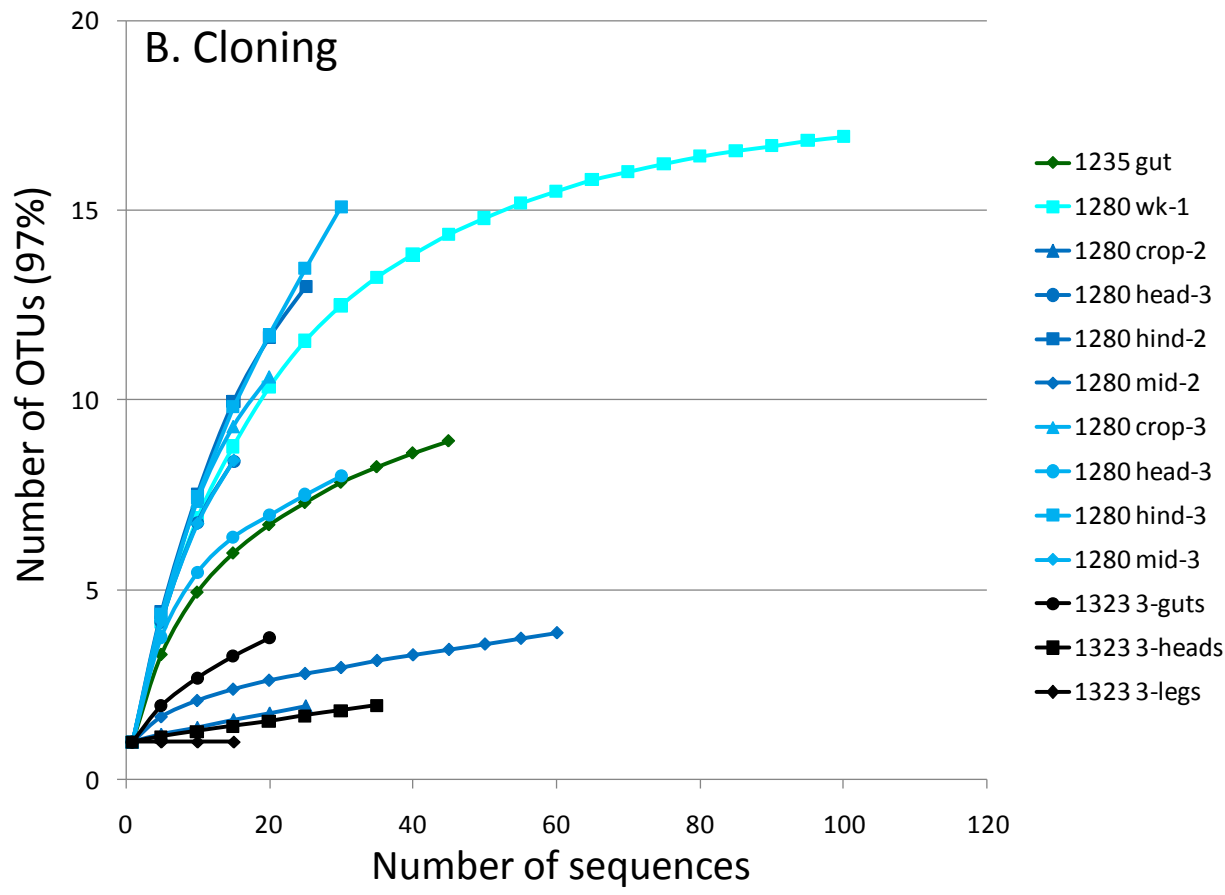

Fig. S1b - Individual level rarefaction

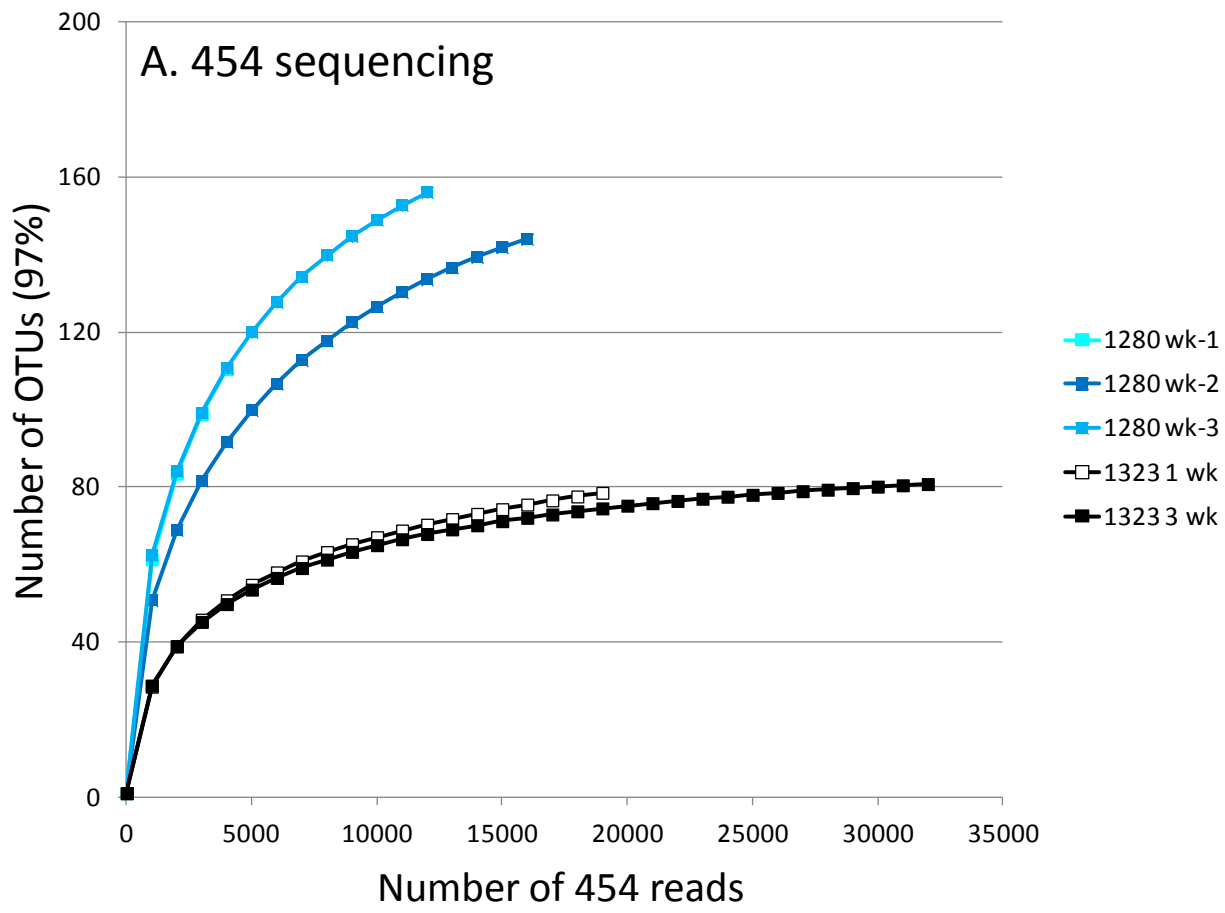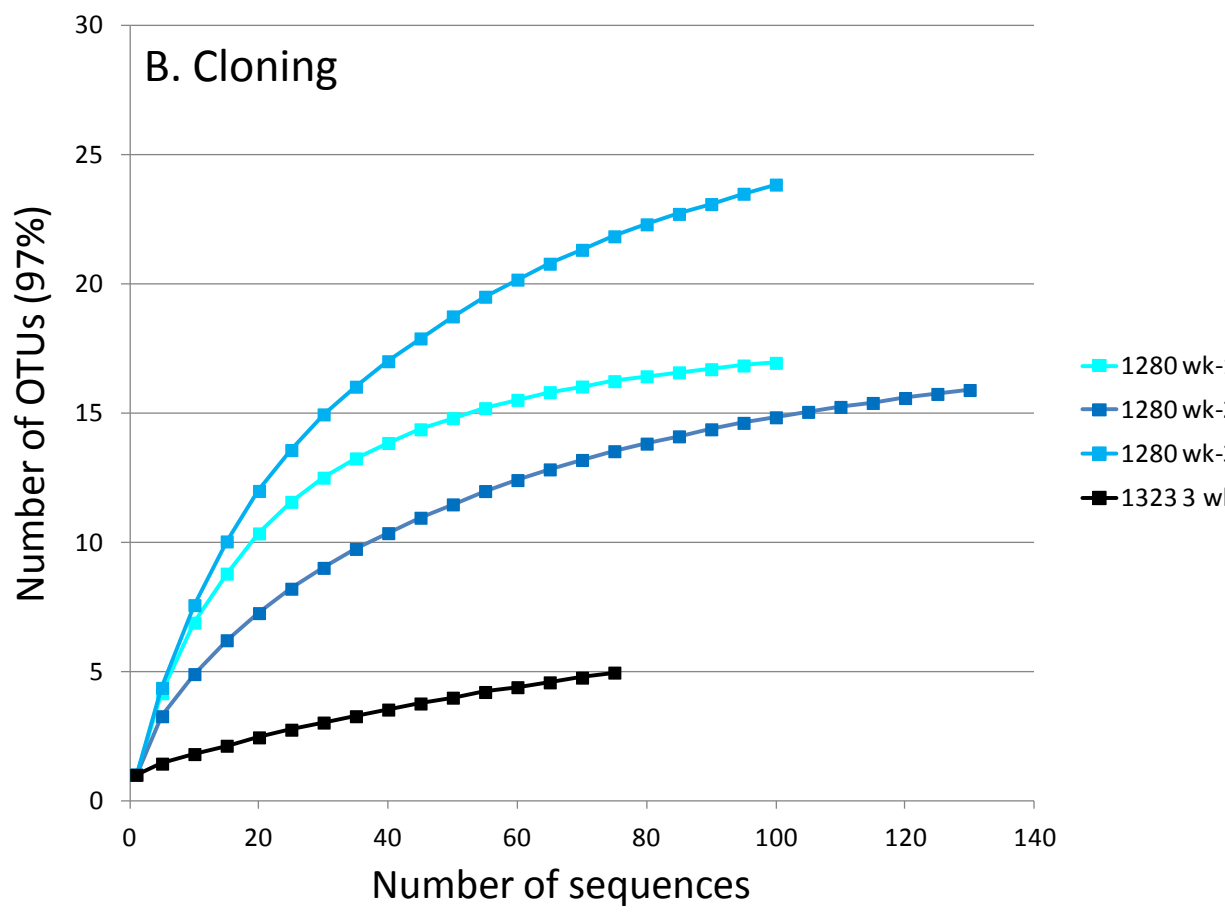

Fig S1c - Rarefaction - guts

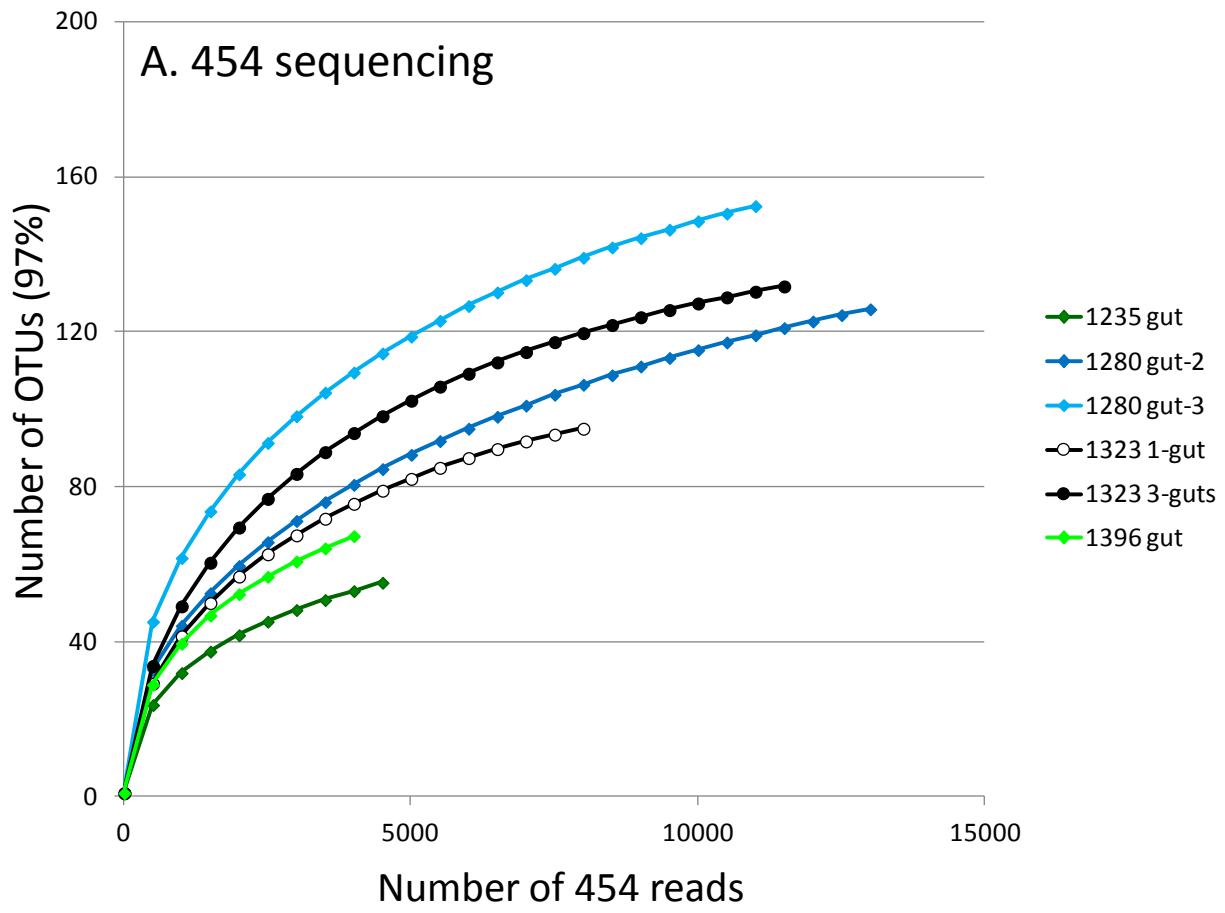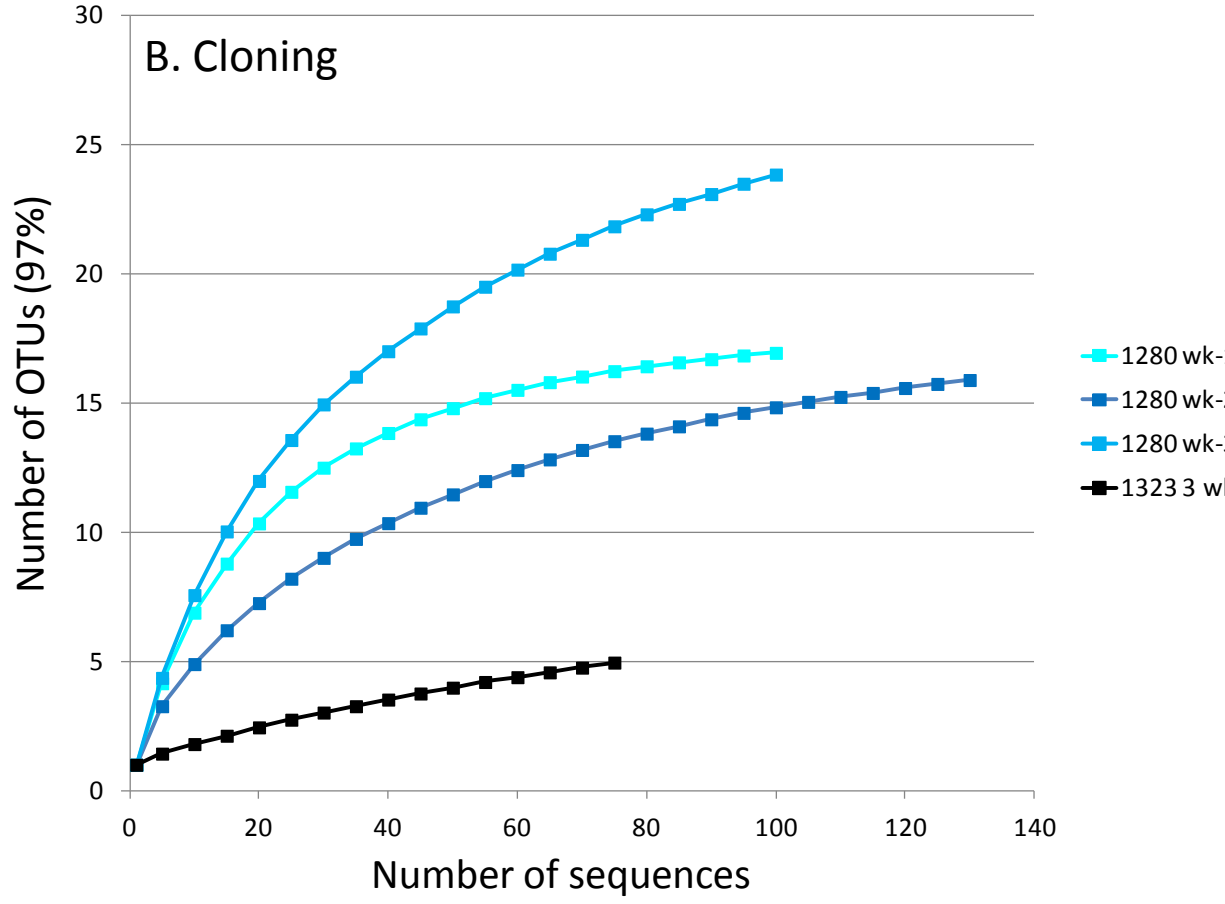

Fig S1d - Colony level rarefaction

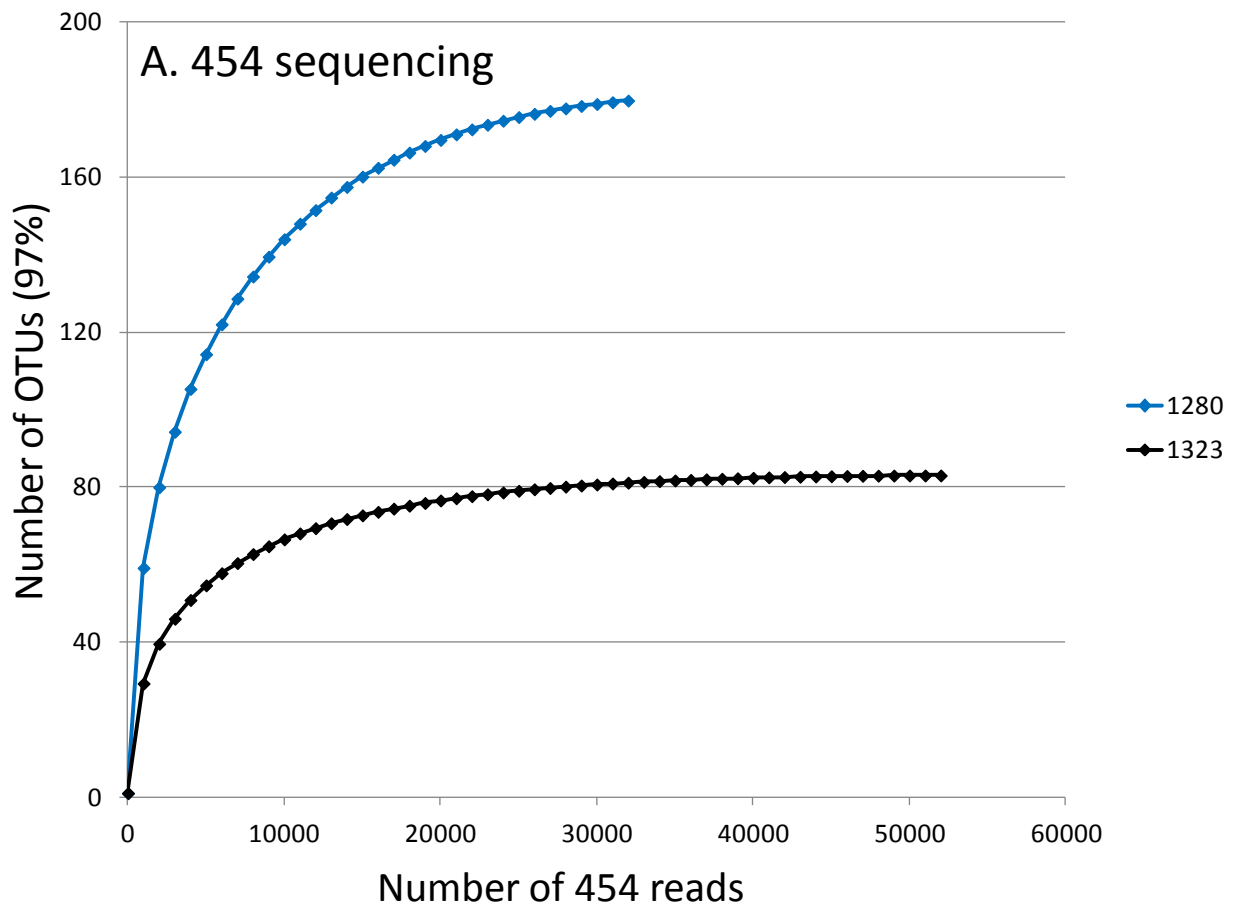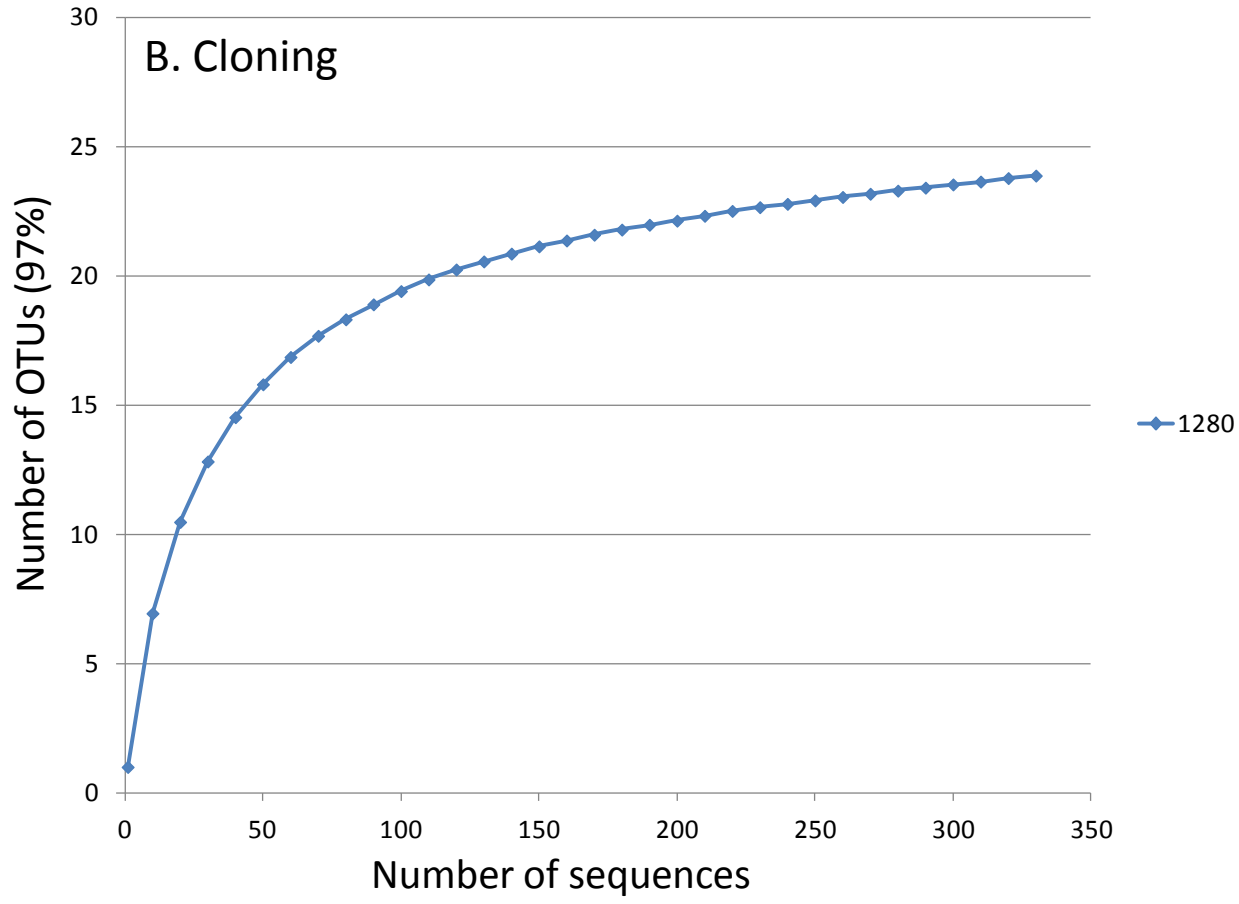

Fig S1e – Species level rarefaction

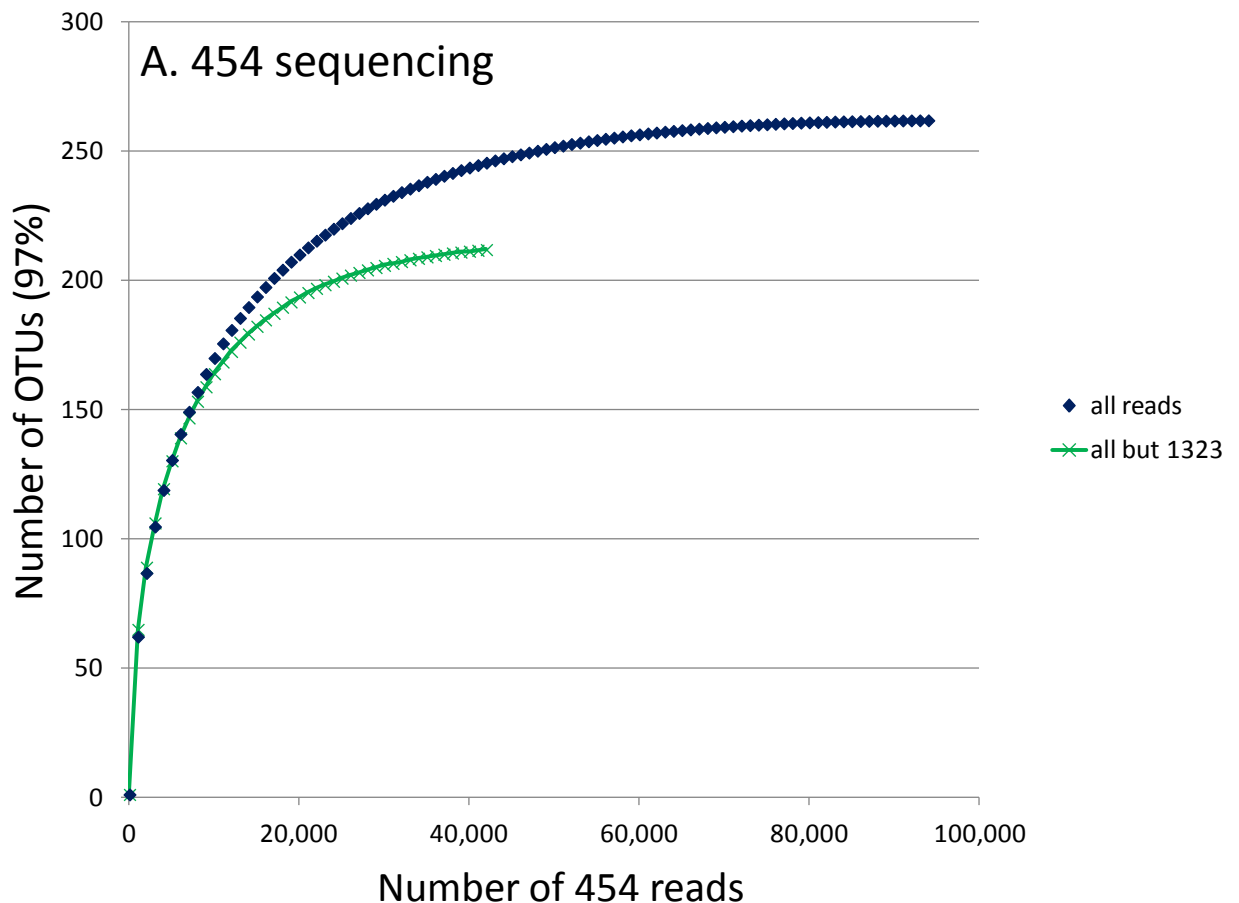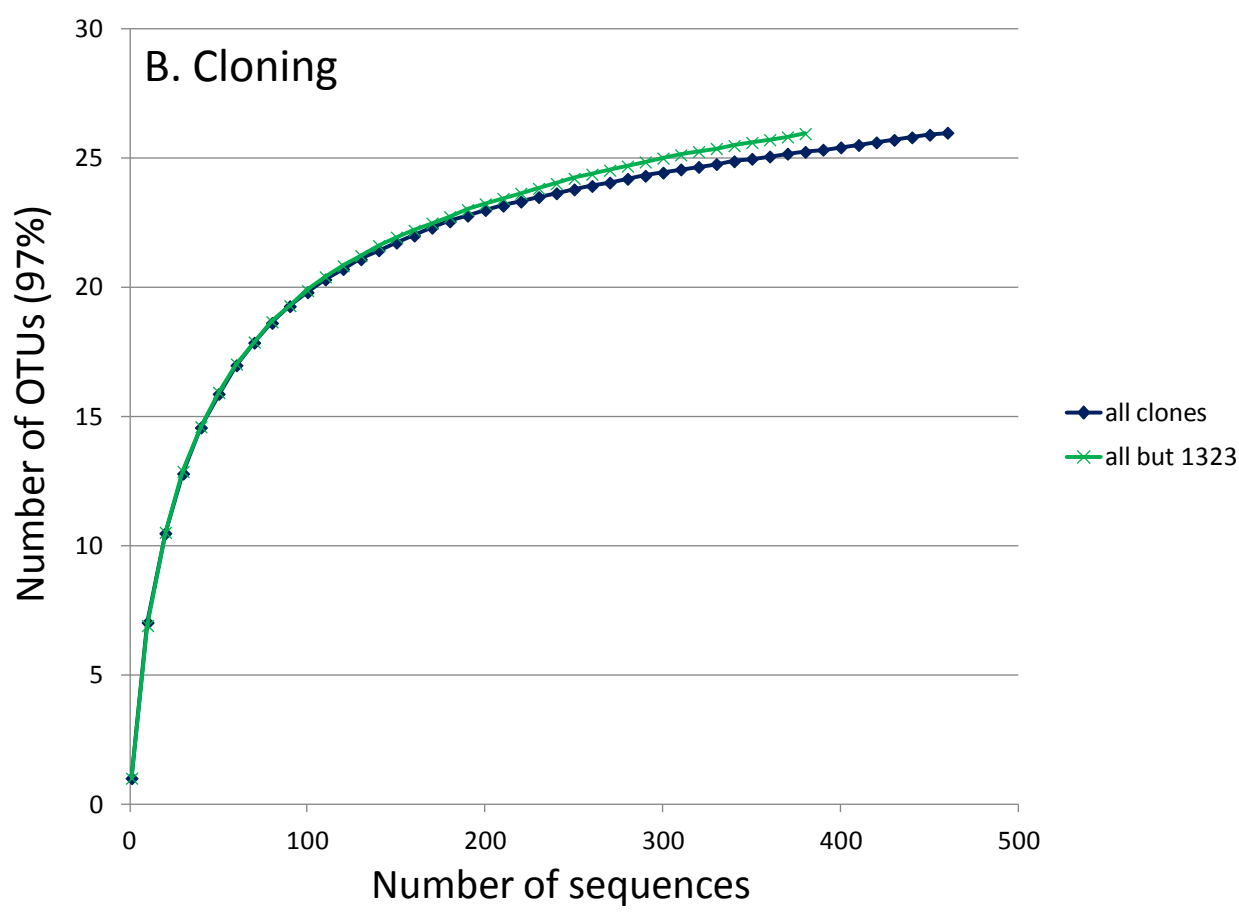

**Fig S1. Ant bacteria species richness rarefaction curves.** Curves were generated of the 97% OTUs for all samples that were subjected to (A) Sanger sequencing of clone libraries and (B) 454 pyrosequencing. To facilitate comparison, in S1b, S1c, S1d, and S1e samples were pooled to combine all reads or clones for each individual ant, gut, colony, and species, respectively if we had analyzed several sub-parts for each level. Note that in S1e, rarefaction curves are displayed for all samples and also for all samples, but excluding the *Spiroplasma* infected colony CSM1323. Bacterial sample origins are denoted by colored lines and shapes as denoted in the legend. Note that "hind" refers to the hindgut, "mid" to the midgut, and "wk" to an entire worker.
