# Supplementary material
Source: PubMed Central journal article supplement (PMC3553759)
Supplement: AEM.03107-12_zam999104008so3.pdf [file AEM.03107-12_zam999104008so3.pdf]

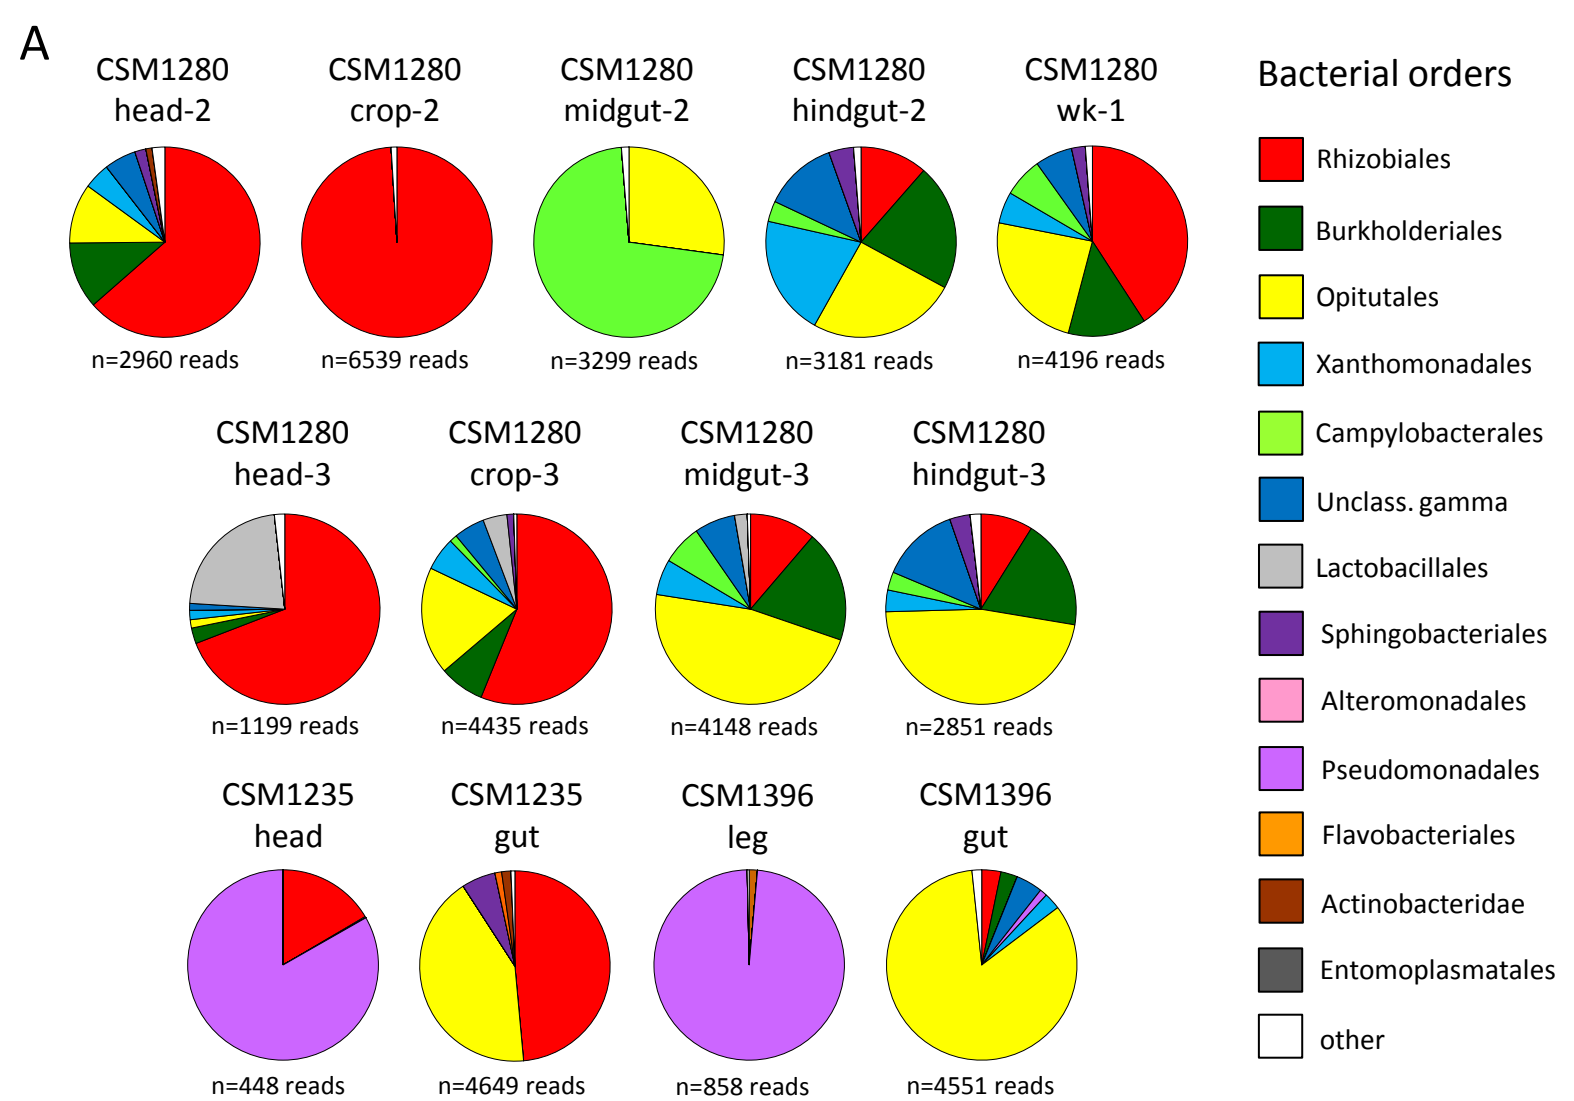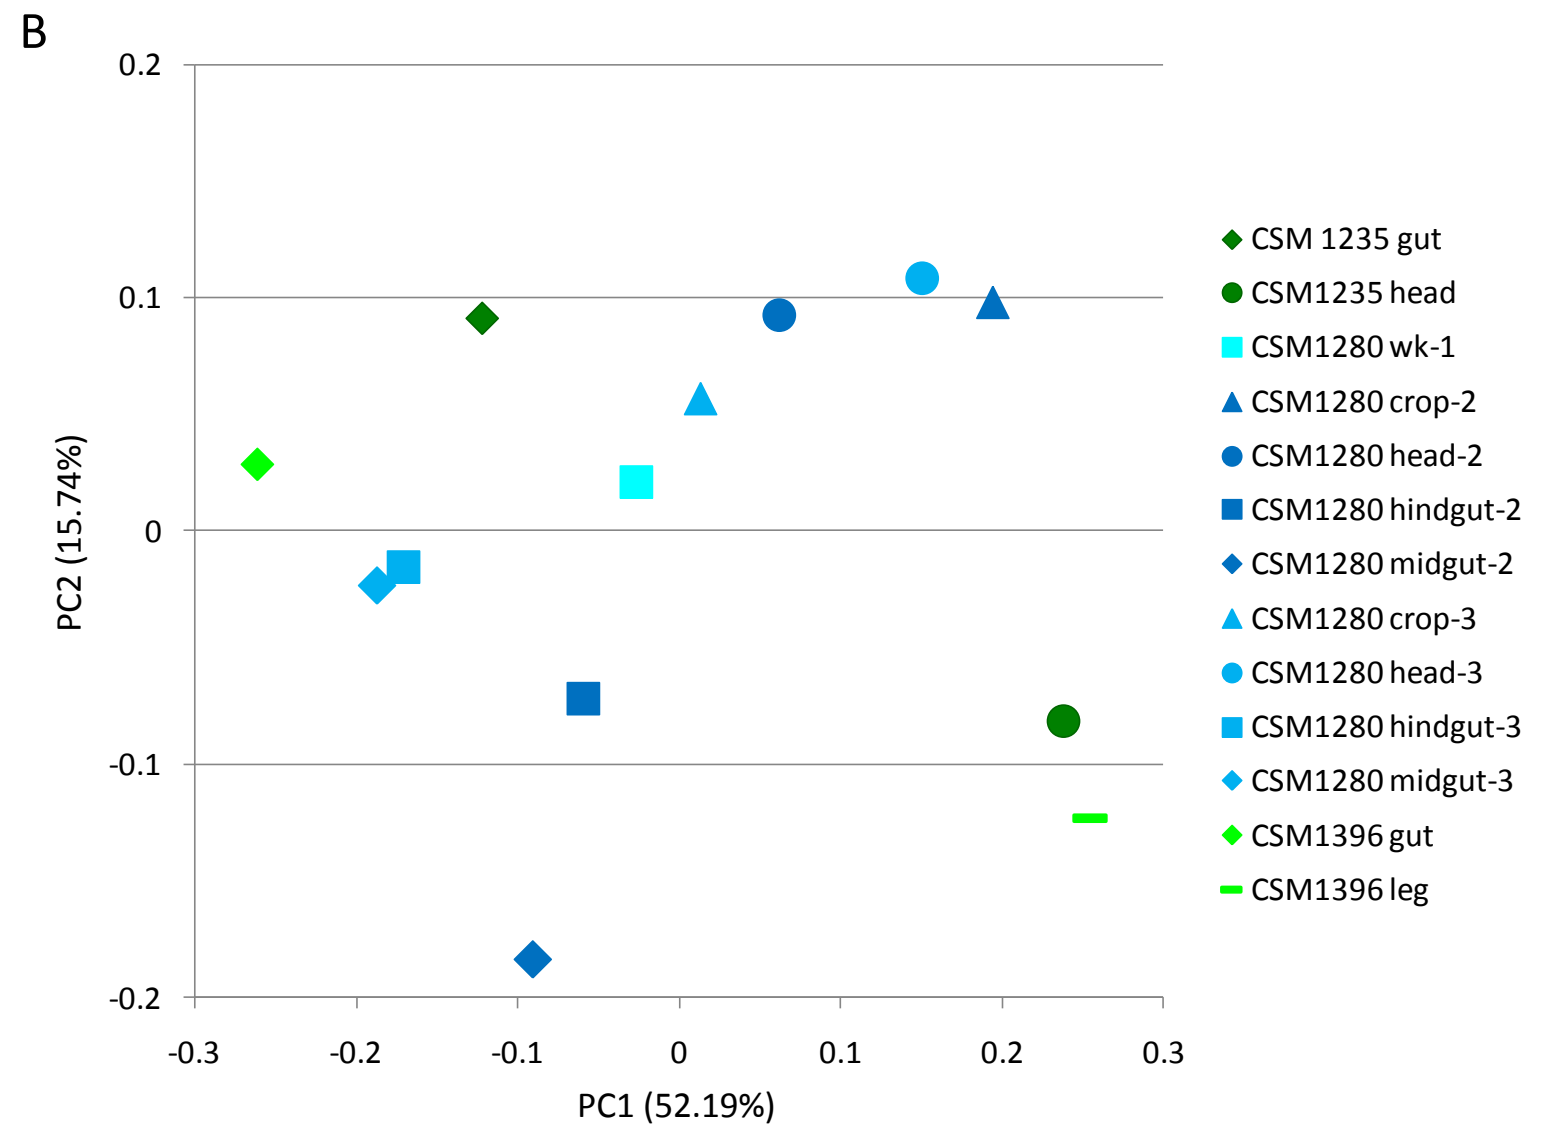

**Figure S3. Comparison of bacterial communities associated with different body parts of *Cephalotes varians* ants detected through 454 pyrosequencing.** A. Relative abundance of reads at the taxonomic level of bacterial orders is displayed. Orders that accounted for less than 1% in a sample were summarized in the category "other". "Unclass. gamma" refers to an unclassified gammaproteobacterium that clustered with the Pseudomonadales bacteria. B. PCoA analysis of bacterial communities. Positions of the bacterial communities for each species along the two first principal coordinate axes are illustrated in this figure, along with the percentage of variation explained by each axis. Note the distinct clustering of samples CSM1235 gut and CSM1235 head, whose communities were dominated by a Pseudomonadales bacterium. The clustering of the samples prepared from the hindguts of colony CSM1396 (1396 gut and 1396 leg), of the heads and crops of colony CSM1280, and the hindguts and midguts prepared from colony CSM1280 is also noteworthy. Based on weighted UniFrac distances.
