# Supplementary material
Source: PubMed Central journal article supplement (PMC3553759)
Supplement: AEM.03107-12_zam999104008so4.pdf [file AEM.03107-12_zam999104008so4.pdf]

Table S1. Sample characteristics and alpha-diversity measures for all samples subjected to 454 pyrosequencing and to Sanger sequencing of clone libraries.

| #SampleID         | Colony  | Individual  | Number of ants | Ant part      | Method  | Barcode  | Preservation method |
|-------------------|---------|-------------|----------------|---------------|---------|----------|---------------------|
| CSM1235 gut       | CSM1235 | 1           | 1              | gut           | 454     | ACCGCACA | live material       |
| CSM1235 head      | CSM1235 | 1           | 1              | head          | 454     | ACCCCTTA | live material       |
| CSM1235 leg       | CSM1235 | 1           | 1              | leg           | 454     | N/A      | live material       |
| CSM1280 wk-1      | CSM1280 | 1           | 1              | entire worker | 454     | ACCTCTAA | Ethanol             |
| CSM1280 crop-2    | CSM1280 | 2           | 1              | crop          | 454     | ACGAATGA | Ethanol             |
| CSM1280 head-2    | CSM1280 | 2           | 1              | head          | 454     | ACCTTCCA | Ethanol             |
| CSM1280 hindgut-2 | CSM1280 | 2           | 1              | hindgut       | 454     | ACGCAAAA | Ethanol             |
| CSM1280 midgut-2  | CSM1280 | 2           | 1              | midgut        | 454     | ACGAGCTA | Ethanol             |
| CSM1280 crop-3    | CSM1280 | 3           | 1              | crop          | 454     | ACGCTAGA | Ethanol             |
| CSM1280 head-3    | CSM1280 | 3           | 1              | head          | 454     | ACGCCGCA | Ethanol             |
| CSM1280 hindgut-3 | CSM1280 | 3           | 1              | hindgut       | 454     | ACGGGCAA | Ethanol             |
| CSM1280 midgut-3  | CSM1280 | 3           | 1              | midgut        | 454     | ACGGAGTA | Ethanol             |
| CSM1323 1-gut     | CSM1323 | 1           | 1              | gut           | 454     | ACGAGCTA | live material       |
| CSM1323 3-guts    | CSM1323 | 2, 3, and 4 | 3              | gut           | 454     | ACCTCTAA | live material       |
| CSM1323 1-head    | CSM1323 | 1           | 1              | head          | 454     | ACCTTCCA | live material       |
| CSM1323 3-heads   | CSM1323 | 2, 3, and 4 | 3              | head          | 454     | ACCGGGGA | live material       |
| CSM1323 1-leg     | CSM1323 | 1           | 1              | leg           | 454     | ACGAATGA | live material       |
| CSM1323 3-legs    | CSM1323 | 2, 3, and 4 | 3              | leg           | 454     | ACCTAATA | live material       |
| CSM1396 gut       | CSM1396 | 1           | 1              | gut           | 454     | ACTAAGAA | live material       |
| CSM1396 head      | CSM1396 | 1           | 1              | head          | 454     | N/A      | live material       |
| CSM1396 leg       | CSM1396 | 1           | 1              | leg           | 454     | ACGTGTTA | live material       |
| CSM1235 gut       | CSM1235 | 1           | 1              | gut           | cloning | N/A      | live material       |
| CSM1280 wk-1      | CSM1280 | 1           | 1              | entire worker | cloning | N/A      | Ethanol             |
| CSM1280 crop-2    | CSM1280 | 2           | 1              | crop          | cloning | N/A      | Ethanol             |
| CSM1280 head-2    | CSM1280 | 2           | 1              | head          | cloning | N/A      | Ethanol             |
| CSM1280 hindgut-2 | CSM1280 | 2           | 1              | hindgut       | cloning | N/A      | Ethanol             |
| CSM1280 midgut-2  | CSM1280 | 2           | 1              | midgut        | cloning | N/A      | Ethanol             |
| CSM1280 crop-3    | CSM1280 | 3           | 1              | crop          | cloning | N/A      | Ethanol             |
| CSM1280 head-3    | CSM1280 | 3           | 1              | head          | cloning | N/A      | Ethanol             |
| CSM1280 hindgut-3 | CSM1280 | 3           | 1              | hindgut       | cloning | N/A      | Ethanol             |
| CSM1280 midgut-3  | CSM1280 | 3           | 1              | midgut        | cloning | N/A      | Ethanol             |
| CSM1323 3-guts    | CSM1323 | 2, 3, and 4 | 3              | gut           | cloning | N/A      | live material       |
| CSM1323 3-heads   | CSM1323 | 2, 3, and 4 | 3              | head          | cloning | N/A      | live material       |
| CSM1323 3-legs    | CSM1323 | 2, 3, and 4 | 3              | leg           | cloning | N/A      | live material       |

Table S1. Continued.

| #SampleID                     | Number of reads/clones (before quality control) | Number of bases (before quality control) | Number of reads after quality control | Number bases after quality control | Number of reads/clones (after quality control and chimera and singleton filtering) | total % discarded |
|-------------------------------|-------------------------------------------------|------------------------------------------|---------------------------------------|------------------------------------|------------------------------------------------------------------------------------|-------------------|
| 454 sequencing                |                                                 |                                          |                                       |                                    |                                                                                    |                   |
| CSM1235 gut                   | 8033                                            | 2549707                                  | 4911                                  | 2062610                            | 4649                                                                               | 42.13             |
| CSM1235 head                  | 512                                             | 235,448                                  | 462                                   | 212,686                            | 448                                                                                | 12.50             |
| CSM1235 leg                   | none retrieved                                  | NA                                       | NA                                    | NA                                 | NA                                                                                 | NA                |
| CSM1280 wk-1                  | 6,854                                           | 2,406,334                                | 5,234                                 | 2,049,722                          | 4,196                                                                              | 38.78             |
| CSM1280 crop-2                | 7,375                                           | 3,032,333                                | 6,599                                 | 2,721,198                          | 6,539                                                                              | 11.34             |
| CSM1280 head-2                | 4,671                                           | 1,626,298                                | 3,502                                 | 1,384,410                          | 2,960                                                                              | 36.63             |
| CSM1280 hindgut-2             | 6,512                                           | 1,924,803                                | 4,064                                 | 1,501,950                          | 3,181                                                                              | 51.15             |
| CSM1280 midgut-2              | 4,370                                           | 1,699,565                                | 3,474                                 | 1,376,408                          | 3,299                                                                              | 24.51             |
| CSM1280 crop-3                | 6,783                                           | 2,381,168                                | 5,164                                 | 2,031,988                          | 4,435                                                                              | 34.62             |
| CSM1280 head-3                | 1773                                            | 613972                                   | 1358                                  | 533149                             | 1199                                                                               | 32.37             |
| CSM1280 hindgut-3             | 5457                                            | 1852846                                  | 4142                                  | 1560182                            | 2851                                                                               | 47.76             |
| CSM1280 midgut-3              | 7,387                                           | 2,423,953                                | 5,263                                 | 2,003,500                          | 4,148                                                                              | 43.85             |
| CSM1323 1-gut                 | 11,678                                          | 4,371,577                                | 8,684                                 | 3,718,000                          | 8,165                                                                              | 30.08             |
| CSM1323 3-guts                | 19,871                                          | 6,741,581                                | 13,014                                | 5,532,639                          | 11,536                                                                             | 41.95             |
| CSM1323 1-head                | 10,776                                          | 4,213,055                                | 8,437                                 | 3,628,262                          | 8,132                                                                              | 24.54             |
| CSM1323 3-heads               | 14,543                                          | 6,062,003                                | 14,186                                | 5,349,267                          | 11,807                                                                             | 18.81             |
| CSM1323 1-leg                 | 4,184                                           | 1,667,002                                | 3,333                                 | 1,440,565                          | 3,229                                                                              | 22.83             |
| CSM1323 3-legs                | 12354                                           | 4943579                                  | 9932                                  | 4296272                            | 9473                                                                               | 23.32             |
| CSM1396 gut                   | 10,492                                          | 2,732,274                                | 5,015                                 | 2,009,130                          | 4,551                                                                              | 56.62             |
| CSM1396 head                  | none retrieved                                  | NA                                       | NA                                    | NA                                 | NA                                                                                 | NA                |
| CSM1396 leg                   | 1,054                                           | 474,511                                  | 913                                   | 425,419                            | 858                                                                                | 18.60             |
| <b>Total 454</b>              | 144,679                                         | 51,952,009                               | 107,687                               | 43,837,357                         | 95,656                                                                             |                   |
| cloning and Sanger sequencing |                                                 |                                          |                                       |                                    |                                                                                    |                   |
| CSM1235 gut                   | 49                                              | 36,716                                   |                                       |                                    | 46                                                                                 | 6.12              |
| CSM1280 wk-1                  | 105                                             | 84,162                                   |                                       |                                    | 103                                                                                | 1.90              |
| CSM1280 crop-2                | 27                                              | 19,725                                   |                                       |                                    | 27                                                                                 | 0.00              |
| CSM1280 head-2                | 20                                              | 13,210                                   |                                       |                                    | 17                                                                                 | 15.00             |
| CSM1280 hindgut-2             | 31                                              | 23,450                                   |                                       |                                    | 25                                                                                 | 19.35             |
| CSM1280 midgut-2              | 64                                              | 50,699                                   |                                       |                                    | 64                                                                                 | 0.00              |
| CSM1280 crop-3                | 23                                              | 14,666                                   |                                       |                                    | 21                                                                                 | 8.70              |
| CSM1280 head-3                | 33                                              | 24,019                                   |                                       |                                    | 30                                                                                 | 9.09              |
| CSM1280 hindgut-3             | 36                                              | 24,579                                   |                                       |                                    | 33                                                                                 | 8.33              |
| CSM1280 midgut-3              | 19                                              | 12,728                                   |                                       |                                    | 18                                                                                 | 5.26              |
| CSM1323 3-guts                | 23                                              | 17,657                                   |                                       |                                    | 23                                                                                 | 0.00              |
| CSM1323 3-heads               | 36                                              | 29,256                                   |                                       |                                    | 36                                                                                 | 0.00              |
| CSM1323 3-legs                | 17                                              | 13,662                                   |                                       |                                    | 17                                                                                 | 0.00              |
| <b>Total cloning</b>          | 483                                             | 364,529                                  |                                       |                                    | 460                                                                                |                   |

Table S1. Continued.

| #SampleID                     | Rarefied to  | Number of OTUs | Chao1  | Chao1 upper bound | Chao1 lower bound | Shannon Index | Simpson's Index |
|-------------------------------|--------------|----------------|--------|-------------------|-------------------|---------------|-----------------|
| 454 sequencing                |              |                |        |                   |                   |               |                 |
| CSM1235 gut                   | not rarefied | 56.00          | 84.50  | 65.18             | 144.45            | 2.55          | 0.73            |
| CSM1235 head                  | not rarefied | 7              | 8.00   | 7.07              | 20.79             | 1.16          | 0.40            |
| CSM1235 leg                   | not rarefied | NA             | NA     | NA                | NA                | NA            | NA              |
| CSM1280 wk-1                  | not rarefied | 111            | 158.83 | 132.96            | 215.20            | 3.83          | 0.86            |
| CSM1280 crop-2                | not rarefied | 20             | 25.25  | 21.00             | 47.61             | 0.24          | 0.05            |
| CSM1280 head-2                | not rarefied | 95             | 110.95 | 101.22            | 135.93            | 3.17          | 0.70            |
| CSM1280 hindgut-2             | not rarefied | 111            | 156.56 | 131.76            | 210.97            | 4.23          | 0.90            |
| CSM1280 midgut-2              | not rarefied | 33             | 38.00  | 34.16             | 54.57             | 1.59          | 0.50            |
| CSM1280 crop-3                | not rarefied | 111            | 180.00 | 143.03            | 259.62            | 3.08          | 0.71            |
| CSM1280 head-3                | not rarefied | 46             | 77.667 | 56.40             | 142.45            | 2.27          | 0.62            |
| CSM1280 hindgut-3             | not rarefied | 92             | 114.24 | 100.83            | 147.99            | 3.81          | 0.84            |
| CSM1280 midgut-3              | not rarefied | 100            | 146.75 | 119.54            | 211.84            | 3.70          | 0.82            |
| CSM1323 1-gut                 | not rarefied | 96             | 107.50 | 100.21            | 127.42            | 1.73          | 0.43            |
| CSM1323 3-guts                | not rarefied | 132            | 148.11 | 138.54            | 171.69            | 1.84          | 0.46            |
| CSM1323 1-head                | not rarefied | 40             | 47.50  | 41.77             | 71.71             | 0.54          | 0.11            |
| CSM1323 3-heads               | not rarefied | 46             | 53.50  | 47.77             | 77.71             | 0.50          | 0.10            |
| CSM1323 1-leg                 | not rarefied | 34             | 51.50  | 39.12             | 93.84             | 0.71          | 0.15            |
| CSM1323 3-legs                | not rarefied | 43             | 44.875 | 43.29             | 54.99             | 0.58          | 0.12            |
| CSM1396 gut                   | not rarefied | 69             | 94.09  | 78.24             | 137.12            | 1.61          | 0.36            |
| CSM1396 head                  | not rarefied | NA             | NA     | NA                | NA                | NA            | NA              |
| CSM1396 leg                   | not rarefied | 8              | 8.00   | 8.00              | 8.00              | 0.33          | 0.08            |
| cloning and Sanger sequencing |              |                |        |                   |                   |               |                 |
| CSM1235 gut                   | not rarefied | 9              | 10.50  | 9.15              | 24.08             | 2.46          | 0.75            |
| CSM1280 wk-1                  | not rarefied | 17             | 17.33  | 17.02             | 22.96             | 3.64          | 0.90            |
| CSM1280 crop-2                | not rarefied | 2              | 2.00   | 2.00              | 2.00              | 0.23          | 0.07            |
| CSM1280 head-2                | not rarefied | 9              | 19.00  | 10.92             | 61.04             | 2.97          | 0.86            |
| CSM1280 hindgut-2             | not rarefied | 13             | 16.00  | 13.50             | 30.95             | 3.48          | 0.90            |
| CSM1280 midgut-2              | not rarefied | 4              | 5.00   | 4.08              | 17.27             | 0.77          | 0.27            |
| CSM1280 crop-3                | not rarefied | 11             | 12.20  | 11.14             | 21.37             | 3.30          | 0.89            |
| CSM1280 head-3                | not rarefied | 8              | 11.00  | 8.36              | 32.93             | 2.67          | 0.82            |
| CSM1280 hindgut-3             | not rarefied | 16             | 38.50  | 21.23             | 112.77            | 3.63          | 0.90            |
| CSM1280 midgut-3              | not rarefied | 9              | 9.50   | 9.04              | 15.21             | 2.97          | 0.85            |
| CSM1323 3-guts                | not rarefied | 4              | 5.00   | 4.08              | 17.27             | 1.05          | 0.37            |
| CSM1323 3-heads               | not rarefied | 2              | 2.00   | 2.00              | 2.00              | 0.18          | 0.05            |
| CSM1323 3-legs                | not rarefied | 1              | 1.00   | 1.00              | 1.00              | 0.00          | 0.00            |

Table S1. Continued.

| #SampleID                                                                         | Rarefied to | Number of OTUs | Chao1 | Chao1 upper bound | Chao1 lower bound | Shannon Index | Simpson's Index |
|-----------------------------------------------------------------------------------|-------------|----------------|-------|-------------------|-------------------|---------------|-----------------|
| <b>Read number randomly rarefied to lowest read number in respective data set</b> |             |                |       |                   |                   |               |                 |
| Analysis 1: Within-colony analyzes - clony CSM1280                                |             |                |       |                   |                   |               |                 |
| CSM1280 wk-1                                                                      | 1000        | 63             | 125   | 87.38             | 220.68            | 3.42          | 3.84            |
| CSM1280 crop-2                                                                    | 1000        | 7              | 7.5   | 7.03              | 15.26             | 0.82          | 0.21            |
| CSM1280 head-2                                                                    | 1000        | 65             | 153   | 98.48             | 296.33            | 3.76          | 3.16            |
| CSM1280 hindgut-2                                                                 | 1000        | 68             | 134   | 94.17             | 234.46            | 3.16          | 4.13            |
| CSM1280 midgut-2                                                                  | 1000        | 19             | 26    | 20.34             | 55.54             | 1.45          | 1.64            |
| CSM1280 crop-3                                                                    | 1000        | 58             | 90.5  | 70.26             | 144.17            | 3.23          | 3.03            |
| CSM1280 head-3                                                                    | 1000        | 43             | 68.5  | 51.05             | 123.79            | 3.12          | 2.29            |
| CSM1280 hindgut-3                                                                 | 1000        | 58             | 88    | 68.17             | 146.47            | 3.22          | 3.71            |
| CSM1280 midgut-3                                                                  | 1000        | 56             | 81.67 | 65.03             | 128.93            | 2.96          | 3.60            |
| Analysis 1: Within-colony analyzes - clony CSM1323                                |             |                |       |                   |                   |               |                 |
| CSM1323 1-gut                                                                     | 3000        | 89             | 120   | 101.94            | 163.28            | 2.47          | 2.03            |
| CSM1323 3-guts                                                                    | 3000        | 88             | 132   | 106.22            | 194.23            | 2.4           | 2.24            |
| CSM1323 1-head                                                                    | 3000        | 39             | 52    | 42.55             | 86.57             | 0.84          | 0.79            |
| CSM1323 3-heads                                                                   | 3000        | 41             | 46    | 42.22             | 61.57             | 0.68          | 0.71            |
| CSM1323 1-leg                                                                     | 3000        | 40             | 57.5  | 45.12             | 99.84             | 0.8           | 0.95            |
| CSM1323 3-legs                                                                    | 3000        | 39             | 45.88 | 40.71             | 66.65             | 0.29          | 0.86            |
| Analysis 2: Between methods analyzes - 454 vs. cloning                            |             |                |       |                   |                   |               |                 |
| CSM1235 gut                                                                       | 17          | 7              | 17    | 8.93              | 58.75             | 2.25          | 0.73            |
| CSM1235 gut-clone                                                                 | 17          | 7              | 17    | 8.93              | 58.75             | 2.13          | 0.67            |
| CSM1280 wk-1                                                                      | 17          | 8              | 13    | 8.78              | 40.14             | 2.53          | 0.77            |
| CSM1280 wk-1-clone                                                                | 17          | 10             | 11    | 10.11             | 18.97             | 3.22          | 0.89            |
| CSM1280 crop-2                                                                    | 17          | 1              | 1     | 1.00              | 1.00              | 0.00          | 0.00            |
| CSM1280 crop-2-clone                                                              | 17          | 2              | 2     | 2.00              | 2.00              | 0.32          | 0.11            |
| CSM1280 head-2                                                                    | 17          | 8              | 29    | 13.15             | 93.56             | 2.13          | 0.63            |
| CSM1280 head-2-clone                                                              | 17          | 9              | 19    | 10.92             | 61.04             | 2.97          | 0.86            |
| CSM1280 hindgut-2                                                                 | 17          | 11             | 25    | 13.92             | 78.11             | 3.22          | 0.87            |
| CSM1280 hind-2-clone                                                              | 17          | 11             | 14    | 11.50             | 28.95             | 3.34          | 0.89            |
| CSM1280 midgut-2                                                                  | 17          | 4              | 5     | 4.08              | 17.27             | 1.38          | 0.52            |
| CSM1280 mid-2-clone                                                               | 17          | 2              | 2     | 2.00              | 2.04              | 0.52          | 0.21            |
| CSM1280 crop-3                                                                    | 17          | 7              | 17    | 8.93              | 58.75             | 2.21          | 0.71            |
| CSM1280 crop-3-clone                                                              | 17          | 11             | 16.25 | 12.00             | 38.61             | 3.26          | 0.88            |
| CSM1280 head-3                                                                    | 17          | 7              | 10    | 7.39              | 30.00             | 2.28          | 0.72            |
| CSM1280 head-3-clone                                                              | 17          | 5              | 5     | 5.00              | 5.00              | 2.21          | 0.78            |
| CSM1280 hindgut-3                                                                 | 17          | 11             | 29    | 14.98             | 92.31             | 3.06          | 0.83            |
| CSM1280 hind-3-clone                                                              | 17          | 11             | 39    | 18.46             | 116.04            | 3.25          | 0.88            |

Table S1. Continued.

| #SampleID                                                                         | Rarefied to | Number of OTUs | Chao1 | Chao1 upper bound | Chao1 lower bound | Shannon Index | Simpson's Index |
|-----------------------------------------------------------------------------------|-------------|----------------|-------|-------------------|-------------------|---------------|-----------------|
| <b>Read number randomly rarefied to lowest read number in respective data set</b> |             |                |       |                   |                   |               |                 |
| Analysis 2: Continued                                                             |             |                |       |                   |                   |               |                 |
| CSM1280 midgut-3                                                                  | 17          | 10             | 12.5  | 10.37             | 26.98             | 3.18          | 0.88            |
| CSM1280 mid-3-clone                                                               | 17          | 9              | 9.5   | 9.04              | 15.21             | 3.03          | 0.87            |
| CSM1323 3-guts                                                                    | 17          | 4              | 5     | 4.08              | 17.27             | 1.28          | 0.46            |
| CSM1323 3-guts-clone                                                              | 17          | 4              | 4.5   | 4.03              | 12.26             | 1.14          | 0.39            |
| CSM1323 3-heads                                                                   | 17          | 3              | 3     | 3.00              | 3.00              | 0.83          | 0.30            |
| CSM1323 3-heads-clone                                                             | 17          | 1              | 1     | 1.00              | 1.00              | 0.00          | 0.00            |
| CSMs1323 3-legs                                                                   | 17          | 1              | 1     | 1.00              | 1.00              | 0.00          | 0.00            |
| CSM1323 3-legs-clone                                                              | 17          | 1              | 1     | 1.00              | 1.00              | 0.00          | 0.00            |
| Analysis 3: Between tissue analyses                                               |             |                |       |                   |                   |               |                 |
| CSM1235 gut                                                                       | 400         | 22             | 31.33 | 23.94             | 66.97             | 2.56          | 0.74            |
| CSM1235 head                                                                      | 400         | 6              | 6.00  | 6.00              | 6.00              | 1.12          | 0.39            |
| CSM1280 wk-1                                                                      | 400         | 43             | 85.00 | 56.74             | 171.37            | 3.66          | 0.85            |
| CSM1280 crop-2                                                                    | 400         | 8              | 11.33 | 8.50              | 30.07             | 0.22          | 0.04            |
| CSM1280 head-2                                                                    | 400         | 39             | 73.00 | 49.10             | 153.42            | 3.10          | 0.72            |
| CSM1280 hindgut-2                                                                 | 400         | 47             | 59.36 | 50.90             | 86.18             | 4.12          | 0.90            |
| CSM1280 midgut-2                                                                  | 400         | 15             | 33.00 | 18.98             | 96.31             | 1.56          | 0.53            |
| CSM1280 crop-3                                                                    | 400         | 40             | 78    | 52.24             | 158.02            | 2.88          | 0.70            |
| CSM1280 head-3                                                                    | 400         | 33             | 54.86 | 39.98             | 101.44            | 1.84          | 0.43            |
| CSM1280 hindgut-3                                                                 | 400         | 52             | 69.50 | 58.11             | 102.09            | 3.74          | 0.82            |
| CSM1280 midgut-3                                                                  | 400         | 36             | 45.75 | 38.67             | 71.54             | 3.32          | 0.78            |
| CSM1396 gut                                                                       | 400         | 29             | 35.88 | 30.71             | 56.65             | 1.85          | 0.44            |
| CSM1396 leg                                                                       | 400         | 6              | 6.00  | 6.00              | 6.00              | 0.30          | 0.07            |
