# Supplementary material
Source: PubMed Central journal article supplement (PMC3553759)
Supplement: AEM.03107-12_zam999104008so5.pdf [file AEM.03107-12_zam999104008so5.pdf]

Table S2: Information on the sequences utilized in this study. Sequence names and descriptions of the host ants (i.e. taxa, tissues utilized for DNA extraction, collection/rearing history) are provided as well as GenBank Accession numbers and bacterial taxonomy based on the Ribosomal Database Project.

| Accession | Host colony ID | Host ant ID (where necessary for clarity) | Host ant tissue           | Ant caste and developmental stage | Field caught or lab reared? | # of ants used for extractions |
|-----------|----------------|-------------------------------------------|---------------------------|-----------------------------------|-----------------------------|--------------------------------|
| JQ254320  | CSM1235        |                                           | crop, mid-, and hind-gut  | adult worker                      | lab reared for 26 weeks     | 1                              |
| JQ254321  | CSM1235        |                                           | crop, mid-, and hind-gut  | adult worker                      | lab reared for 26 weeks     | 1                              |
| JQ254322  | CSM1235        |                                           | crop, mid-, and hind-gut  | adult worker                      | lab reared for 26 weeks     | 1                              |
| JQ254323  | CSM1235        |                                           | crop, mid-, and hind-gut  | adult worker                      | lab reared for 26 weeks     | 1                              |
| JQ254324  | CSM1235        |                                           | crop, mid-, and hind-gut  | adult worker                      | lab reared for 26 weeks     | 1                              |
| JQ254325  | CSM1235        |                                           | crop, mid-, and hind-gut  | adult worker                      | lab reared for 26 weeks     | 1                              |
| JQ254326  | CSM1235        |                                           | crop, mid-, and hind-gut  | adult worker                      | lab reared for 26 weeks     | 1                              |
| JQ254327  | CSM1235        |                                           | crop, mid-, and hind-gut  | adult worker                      | lab reared for 26 weeks     | 1                              |
| JQ254328  | CSM1235        |                                           | crop, mid-, and hind-gut  | adult worker                      | lab reared for 26 weeks     | 1                              |
| JQ254329  | CSM1235        |                                           | crop, mid-, and hind-gut  | adult worker                      | lab reared for 26 weeks     | 1                              |
| JQ254330  | CSM1235        |                                           | crop, mid-, and hind-gut  | adult worker                      | lab reared for 26 weeks     | 1                              |
| JQ254331  | CSM1235        |                                           | crop, mid-, and hind-gut  | adult worker                      | lab reared for 26 weeks     | 1                              |
| JQ254332  | CSM1235        |                                           | crop, mid-, and hind-gut  | adult worker                      | lab reared for 26 weeks     | 1                              |
| JQ254333  | CSM1235        |                                           | crop, mid-, and hind-gut  | adult worker                      | lab reared for 26 weeks     | 1                              |
| JQ254334  | CSM1235        |                                           | crop, mid-, and hind-gut  | adult worker                      | lab reared for 26 weeks     | 1                              |
| JX990165  | CSM1235        |                                           | crop, mid-, and hind-guts | adult worker                      | lab reared for 26 weeks     | 1                              |
| JQ254335  | CSM1235        |                                           | crop, mid-, and hind-gut  | adult worker                      | lab reared for 26 weeks     | 1                              |
| JQ254336  | CSM1235        |                                           | crop, mid-, and hind-gut  | adult worker                      | lab reared for 26 weeks     | 1                              |
| JQ254337  | CSM1235        |                                           | crop, mid-, and hind-gut  | adult worker                      | lab reared for 26 weeks     | 1                              |
| JQ254338  | CSM1235        |                                           | crop, mid-, and hind-gut  | adult worker                      | lab reared for 26 weeks     | 1                              |
| JQ254339  | CSM1235        |                                           | crop, mid-, and hind-gut  | adult worker                      | lab reared for 26 weeks     | 1                              |
| JQ254340  | CSM1235        |                                           | crop, mid-, and hind-gut  | adult worker                      | lab reared for 26 weeks     | 1                              |
| JQ254341  | CSM1235        |                                           | crop, mid-, and hind-gut  | adult worker                      | lab reared for 26 weeks     | 1                              |
| JQ254342  | CSM1235        |                                           | crop, mid-, and hind-gut  | adult worker                      | lab reared for 26 weeks     | 1                              |
| JQ254343  | CSM1235        |                                           | crop, mid-, and hind-gut  | adult worker                      | lab reared for 26 weeks     | 1                              |

|          |         |      |                           |              |                         |   |
|----------|---------|------|---------------------------|--------------|-------------------------|---|
| JQ254344 | CSM1235 |      | crop, mid-, and hind-gut  | adult worker | lab reared for 26 weeks | 1 |
| JQ254345 | CSM1235 |      | crop, mid-, and hind-gut  | adult worker | lab reared for 26 weeks | 1 |
| JX990166 | CSM1235 |      | crop, mid-, and hind-guts | adult worker | lab reared for 26 weeks | 1 |
| JQ254346 | CSM1235 |      | crop, mid-, and hind-gut  | adult worker | lab reared for 26 weeks | 1 |
| JQ254347 | CSM1235 |      | crop, mid-, and hind-gut  | adult worker | lab reared for 26 weeks | 1 |
| JQ254348 | CSM1235 |      | crop, mid-, and hind-gut  | adult worker | lab reared for 26 weeks | 1 |
| JQ254349 | CSM1235 |      | crop, mid-, and hind-gut  | adult worker | lab reared for 26 weeks | 1 |
| JQ254350 | CSM1235 |      | crop, mid-, and hind-gut  | adult worker | lab reared for 26 weeks | 1 |
| JQ254351 | CSM1235 |      | crop, mid-, and hind-gut  | adult worker | lab reared for 26 weeks | 1 |
| JQ254352 | CSM1235 |      | crop, mid-, and hind-gut  | adult worker | lab reared for 26 weeks | 1 |
| JX990167 | CSM1235 |      | crop, mid-, and hind-guts | adult worker | lab reared for 26 weeks | 1 |
| JQ254353 | CSM1235 |      | crop, mid-, and hind-gut  | adult worker | lab reared for 26 weeks | 1 |
| JQ254354 | CSM1235 |      | crop, mid-, and hind-gut  | adult worker | lab reared for 26 weeks | 1 |
| JQ254355 | CSM1235 |      | crop, mid-, and hind-gut  | adult worker | lab reared for 26 weeks | 1 |
| JQ254356 | CSM1235 |      | crop, mid-, and hind-gut  | adult worker | lab reared for 26 weeks | 1 |
| JQ254357 | CSM1235 |      | crop, mid-, and hind-gut  | adult worker | lab reared for 26 weeks | 1 |
| JQ254358 | CSM1235 |      | crop, mid-, and hind-gut  | adult worker | lab reared for 26 weeks | 1 |
| JX990168 | CSM1235 |      | crop, mid-, and hind-guts | adult worker | lab reared for 26 weeks | 1 |
| JQ254359 | CSM1235 |      | crop, mid-, and hind-gut  | adult worker | lab reared for 26 weeks | 1 |
| JQ254360 | CSM1235 |      | crop, mid-, and hind-gut  | adult worker | lab reared for 26 weeks | 1 |
| JQ254361 | CSM1235 |      | crop, mid-, and hind-gut  | adult worker | lab reared for 26 weeks | 1 |
| JQ254362 | CSM1235 |      | crop, mid-, and hind-gut  | adult worker | lab reared for 26 weeks | 1 |
| JQ254363 | CSM1235 |      | crop, mid-, and hind-gut  | adult worker | lab reared for 26 weeks | 1 |
| JQ254364 | CSM1235 |      | crop, mid-, and hind-gut  | adult worker | lab reared for 26 weeks | 1 |
| JQ254645 | CSM1280 | 1-wk | whole ant                 | adult worker | field caught            | 1 |
| JQ254646 | CSM1280 | 1-wk | whole ant                 | adult worker | field caught            | 1 |
| JQ254647 | CSM1280 | 1-wk | whole ant                 | adult worker | field caught            | 1 |
| JX990169 | CSM1280 | 1-wk | whole ant                 | adult worker | field caught            | 1 |
| JQ254648 | CSM1280 | 1-wk | whole ant                 | adult worker | field caught            | 1 |
| JQ254649 | CSM1280 | 1-wk | whole ant                 | adult worker | field caught            | 1 |
| JQ254650 | CSM1280 | 1-wk | whole ant                 | adult worker | field caught            | 1 |
| JQ254651 | CSM1280 | 1-wk | whole ant                 | adult worker | field caught            | 1 |
| JQ254652 | CSM1280 | 1-wk | whole ant                 | adult worker | field caught            | 1 |
| JQ254653 | CSM1280 | 1-wk | whole ant                 | adult worker | field caught            | 1 |

|          |         |      |           |              |              |   |
|----------|---------|------|-----------|--------------|--------------|---|
| JQ254654 | CSM1280 | 1-wk | whole ant | adult worker | field caught | 1 |
| JQ254655 | CSM1280 | 1-wk | whole ant | adult worker | field caught | 1 |
| JQ254656 | CSM1280 | 1-wk | whole ant | adult worker | field caught | 1 |
| JQ254657 | CSM1280 | 1-wk | whole ant | adult worker | field caught | 1 |
| JQ254658 | CSM1280 | 1-wk | whole ant | adult worker | field caught | 1 |
| JQ254659 | CSM1280 | 1-wk | whole ant | adult worker | field caught | 1 |
| JQ254660 | CSM1280 | 1-wk | whole ant | adult worker | field caught | 1 |
| JQ254661 | CSM1280 | 1-wk | whole ant | adult worker | field caught | 1 |
| JX990170 | CSM1280 | 1-wk | whole ant | adult worker | field caught | 1 |
| JQ254662 | CSM1280 | 1-wk | whole ant | adult worker | field caught | 1 |
| JQ254663 | CSM1280 | 1-wk | whole ant | adult worker | field caught | 1 |
| JQ254664 | CSM1280 | 1-wk | whole ant | adult worker | field caught | 1 |
| JQ254665 | CSM1280 | 1-wk | whole ant | adult worker | field caught | 1 |
| JQ254666 | CSM1280 | 1-wk | whole ant | adult worker | field caught | 1 |
| JQ254667 | CSM1280 | 1-wk | whole ant | adult worker | field caught | 1 |
| JQ254668 | CSM1280 | 1-wk | whole ant | adult worker | field caught | 1 |
| JQ254669 | CSM1280 | 1-wk | whole ant | adult worker | field caught | 1 |
| JQ254670 | CSM1280 | 1-wk | whole ant | adult worker | field caught | 1 |
| JQ254671 | CSM1280 | 1-wk | whole ant | adult worker | field caught | 1 |
| JX990171 | CSM1280 | 1-wk | whole ant | adult worker | field caught | 1 |
| JQ254672 | CSM1280 | 1-wk | whole ant | adult worker | field caught | 1 |
| JQ254673 | CSM1280 | 1-wk | whole ant | adult worker | field caught | 1 |
| JQ254674 | CSM1280 | 1-wk | whole ant | adult worker | field caught | 1 |
| JQ254675 | CSM1280 | 1-wk | whole ant | adult worker | field caught | 1 |
| JQ254676 | CSM1280 | 1-wk | whole ant | adult worker | field caught | 1 |
| JQ254677 | CSM1280 | 1-wk | whole ant | adult worker | field caught | 1 |
| JQ254678 | CSM1280 | 1-wk | whole ant | adult worker | field caught | 1 |
| JQ254679 | CSM1280 | 1-wk | whole ant | adult worker | field caught | 1 |
| JQ254680 | CSM1280 | 1-wk | whole ant | adult worker | field caught | 1 |
| JQ254681 | CSM1280 | 1-wk | whole ant | adult worker | field caught | 1 |
| JQ254682 | CSM1280 | 1-wk | whole ant | adult worker | field caught | 1 |
| JQ254683 | CSM1280 | 1-wk | whole ant | adult worker | field caught | 1 |
| JQ254684 | CSM1280 | 1-wk | whole ant | adult worker | field caught | 1 |
| JQ254685 | CSM1280 | 1-wk | whole ant | adult worker | field caught | 1 |



|          |         |        |           |              |              |   |
|----------|---------|--------|-----------|--------------|--------------|---|
| JQ254720 | CSM1280 | 1-wk   | whole ant | adult worker | field caught | 1 |
| JQ254721 | CSM1280 | 1-wk   | whole ant | adult worker | field caught | 1 |
| JQ254722 | CSM1280 | 1-wk   | whole ant | adult worker | field caught | 1 |
| JQ254723 | CSM1280 | 1-wk   | whole ant | adult worker | field caught | 1 |
| JQ254724 | CSM1280 | 1-wk   | whole ant | adult worker | field caught | 1 |
| JQ254725 | CSM1280 | 1-wk   | whole ant | adult worker | field caught | 1 |
| JQ254726 | CSM1280 | 1-wk   | whole ant | adult worker | field caught | 1 |
| JQ254727 | CSM1280 | 1-wk   | whole ant | adult worker | field caught | 1 |
| JQ254728 | CSM1280 | 1-wk   | whole ant | adult worker | field caught | 1 |
| JQ254729 | CSM1280 | 1-wk   | whole ant | adult worker | field caught | 1 |
| JQ254730 | CSM1280 | 1-wk   | whole ant | adult worker | field caught | 1 |
| JQ254731 | CSM1280 | 1-wk   | whole ant | adult worker | field caught | 1 |
| JQ254732 | CSM1280 | 1-wk   | whole ant | adult worker | field caught | 1 |
| JQ254733 | CSM1280 | 1-wk   | whole ant | adult worker | field caught | 1 |
| JQ254734 | CSM1280 | 1-wk   | whole ant | adult worker | field caught | 1 |
| JQ254735 | CSM1280 | 1-wk   | whole ant | adult worker | field caught | 1 |
| JQ254736 | CSM1280 | 1-wk   | whole ant | adult worker | field caught | 1 |
| JQ254737 | CSM1280 | 1-wk   | whole ant | adult worker | field caught | 1 |
| JX990172 | CSM1280 | 1-wk   | whole ant | adult worker | field caught | 1 |
| JQ254738 | CSM1280 | 1-wk   | whole ant | adult worker | field caught | 1 |
| JQ254739 | CSM1280 | 1-wk   | whole ant | adult worker | field caught | 1 |
| JQ254740 | CSM1280 | 1-wk   | whole ant | adult worker | field caught | 1 |
| JQ254741 | CSM1280 | 1-wk   | whole ant | adult worker | field caught | 1 |
| JQ254742 | CSM1280 | 1-wk   | whole ant | adult worker | field caught | 1 |
| JQ254743 | CSM1280 | 1-wk   | whole ant | adult worker | field caught | 1 |
| JQ254744 | CSM1280 | 1-wk   | whole ant | adult worker | field caught | 1 |
| JX990173 | CSM1280 | 2-crop | crop      | adult worker | field caught | 1 |
| JX990174 | CSM1280 | 2-crop | crop      | adult worker | field caught | 1 |
| JX990175 | CSM1280 | 2-crop | crop      | adult worker | field caught | 1 |
| JX990176 | CSM1280 | 2-crop | crop      | adult worker | field caught | 1 |
| JX990177 | CSM1280 | 2-crop | crop      | adult worker | field caught | 1 |
| JX990178 | CSM1280 | 2-crop | crop      | adult worker | field caught | 1 |
| JX990179 | CSM1280 | 2-crop | crop      | adult worker | field caught | 1 |
| JX990180 | CSM1280 | 2-crop | crop      | adult worker | field caught | 1 |

|          |         |        |      |              |              |   |
|----------|---------|--------|------|--------------|--------------|---|
| JX990181 | CSM1280 | 2-crop | crop | adult worker | field caught | 1 |
| JX990182 | CSM1280 | 2-crop | crop | adult worker | field caught | 1 |
| JX990183 | CSM1280 | 2-crop | crop | adult worker | field caught | 1 |
| JX990184 | CSM1280 | 2-crop | crop | adult worker | field caught | 1 |
| JX990185 | CSM1280 | 2-crop | crop | adult worker | field caught | 1 |
| JX990186 | CSM1280 | 2-crop | crop | adult worker | field caught | 1 |
| JX990187 | CSM1280 | 2-crop | crop | adult worker | field caught | 1 |
| JX990188 | CSM1280 | 2-crop | crop | adult worker | field caught | 1 |
| JX990189 | CSM1280 | 2-crop | crop | adult worker | field caught | 1 |
| JX990190 | CSM1280 | 2-crop | crop | adult worker | field caught | 1 |
| JX990191 | CSM1280 | 2-crop | crop | adult worker | field caught | 1 |
| JX990192 | CSM1280 | 2-crop | crop | adult worker | field caught | 1 |
| JX990193 | CSM1280 | 2-crop | crop | adult worker | field caught | 1 |
| JX990194 | CSM1280 | 2-crop | crop | adult worker | field caught | 1 |
| JX990195 | CSM1280 | 2-crop | crop | adult worker | field caught | 1 |
| JX990196 | CSM1280 | 2-crop | crop | adult worker | field caught | 1 |
| JX990197 | CSM1280 | 2-crop | crop | adult worker | field caught | 1 |
| JX990198 | CSM1280 | 2-crop | crop | adult worker | field caught | 1 |
| JX990199 | CSM1280 | 2-crop | crop | adult worker | field caught | 1 |
| JX990200 | CSM1280 | 2-head | head | adult worker | field caught | 1 |
| JX990201 | CSM1280 | 2-head | head | adult worker | field caught | 1 |
| JX990202 | CSM1280 | 2-head | head | adult worker | field caught | 1 |
| JX990203 | CSM1280 | 2-head | head | adult worker | field caught | 1 |
| JX990204 | CSM1280 | 2-head | head | adult worker | field caught | 1 |
| JX990205 | CSM1280 | 2-head | head | adult worker | field caught | 1 |
| JX990206 | CSM1280 | 2-head | head | adult worker | field caught | 1 |
| JX990207 | CSM1280 | 2-head | head | adult worker | field caught | 1 |
| JX990208 | CSM1280 | 2-head | head | adult worker | field caught | 1 |
| JX990209 | CSM1280 | 2-head | head | adult worker | field caught | 1 |
| JX990210 | CSM1280 | 2-head | head | adult worker | field caught | 1 |
| JX990211 | CSM1280 | 2-head | head | adult worker | field caught | 1 |
| JX990212 | CSM1280 | 2-head | head | adult worker | field caught | 1 |
| JX990213 | CSM1280 | 2-head | head | adult worker | field caught | 1 |
| JX990214 | CSM1280 | 2-head | head | adult worker | field caught | 1 |

|          |         |        |         |              |              |   |
|----------|---------|--------|---------|--------------|--------------|---|
| JX990215 | CSM1280 | 2-head | head    | adult worker | field caught | 1 |
| JX990216 | CSM1280 | 2-head | head    | adult worker | field caught | 1 |
| JX990217 | CSM1280 | 2-head | head    | adult worker | field caught | 1 |
| JX990218 | CSM1280 | 2-head | head    | adult worker | field caught | 1 |
| JQ254745 | CSM1280 | 2-hind | hindgut | adult worker | field caught | 1 |
| JQ254746 | CSM1280 | 2-hind | hindgut | adult worker | field caught | 1 |
| JQ254747 | CSM1280 | 2-hind | hindgut | adult worker | field caught | 1 |
| JQ254748 | CSM1280 | 2-hind | hindgut | adult worker | field caught | 1 |
| JQ254749 | CSM1280 | 2-hind | hindgut | adult worker | field caught | 1 |
| JQ254750 | CSM1280 | 2-hind | hindgut | adult worker | field caught | 1 |
| JQ254751 | CSM1280 | 2-hind | hindgut | adult worker | field caught | 1 |
| JQ254752 | CSM1280 | 2-hind | hindgut | adult worker | field caught | 1 |
| JQ254753 | CSM1280 | 2-hind | hindgut | adult worker | field caught | 1 |
| JQ254754 | CSM1280 | 2-hind | hindgut | adult worker | field caught | 1 |
| JQ254755 | CSM1280 | 2-hind | hindgut | adult worker | field caught | 1 |
| JX990219 | CSM1280 | 2-hind | hindgut | adult worker | field caught | 1 |
| JQ254756 | CSM1280 | 2-hind | hindgut | adult worker | field caught | 1 |
| JQ254757 | CSM1280 | 2-hind | hindgut | adult worker | field caught | 1 |
| JQ254758 | CSM1280 | 2-hind | hindgut | adult worker | field caught | 1 |
| JQ254759 | CSM1280 | 2-hind | hindgut | adult worker | field caught | 1 |
| JQ254760 | CSM1280 | 2-hind | hindgut | adult worker | field caught | 1 |
| JQ254761 | CSM1280 | 2-hind | hindgut | adult worker | field caught | 1 |
| JQ254762 | CSM1280 | 2-hind | hindgut | adult worker | field caught | 1 |
| JQ254763 | CSM1280 | 2-hind | hindgut | adult worker | field caught | 1 |
| JQ254764 | CSM1280 | 2-hind | hindgut | adult worker | field caught | 1 |
| JQ254765 | CSM1280 | 2-hind | hindgut | adult worker | field caught | 1 |
| JQ254766 | CSM1280 | 2-hind | hindgut | adult worker | field caught | 1 |
| JX990220 | CSM1280 | 2-hind | hindgut | adult worker | field caught | 1 |
| JQ254767 | CSM1280 | 2-hind | hindgut | adult worker | field caught | 1 |
| JQ254768 | CSM1280 | 2-hind | hindgut | adult worker | field caught | 1 |
| JQ254769 | CSM1280 | 2-hind | hindgut | adult worker | field caught | 1 |
| JQ254770 | CSM1280 | 2-hind | hindgut | adult worker | field caught | 1 |
| JX990221 | CSM1280 | 2-hind | hindgut | adult worker | field caught | 1 |
| JQ254771 | CSM1280 | 2-mid  | midgut  | adult worker | field caught | 1 |

|          |         |       |        |              |              |   |
|----------|---------|-------|--------|--------------|--------------|---|
| JQ254772 | CSM1280 | 2-mid | midgut | adult worker | field caught | 1 |
| JQ254773 | CSM1280 | 2-mid | midgut | adult worker | field caught | 1 |
| JQ254774 | CSM1280 | 2-mid | midgut | adult worker | field caught | 1 |
| JQ254775 | CSM1280 | 2-mid | midgut | adult worker | field caught | 1 |
| JQ254776 | CSM1280 | 2-mid | midgut | adult worker | field caught | 1 |
| JQ254777 | CSM1280 | 2-mid | midgut | adult worker | field caught | 1 |
| JQ254778 | CSM1280 | 2-mid | midgut | adult worker | field caught | 1 |
| JQ254779 | CSM1280 | 2-mid | midgut | adult worker | field caught | 1 |
| JQ254780 | CSM1280 | 2-mid | midgut | adult worker | field caught | 1 |
| JQ254781 | CSM1280 | 2-mid | midgut | adult worker | field caught | 1 |
| JQ254782 | CSM1280 | 2-mid | midgut | adult worker | field caught | 1 |
| JQ254783 | CSM1280 | 2-mid | midgut | adult worker | field caught | 1 |
| JQ254784 | CSM1280 | 2-mid | midgut | adult worker | field caught | 1 |
| JQ254785 | CSM1280 | 2-mid | midgut | adult worker | field caught | 1 |
| JQ254786 | CSM1280 | 2-mid | midgut | adult worker | field caught | 1 |
| JQ254787 | CSM1280 | 2-mid | midgut | adult worker | field caught | 1 |
| JQ254788 | CSM1280 | 2-mid | midgut | adult worker | field caught | 1 |
| JQ254789 | CSM1280 | 2-mid | midgut | adult worker | field caught | 1 |
| JQ254790 | CSM1280 | 2-mid | midgut | adult worker | field caught | 1 |
| JQ254791 | CSM1280 | 2-mid | midgut | adult worker | field caught | 1 |
| JQ254792 | CSM1280 | 2-mid | midgut | adult worker | field caught | 1 |
| JQ254793 | CSM1280 | 2-mid | midgut | adult worker | field caught | 1 |
| JQ254794 | CSM1280 | 2-mid | midgut | adult worker | field caught | 1 |
| JX990222 | CSM1280 | 2-mid | midgut | adult worker | field caught | 1 |
| JQ254795 | CSM1280 | 2-mid | midgut | adult worker | field caught | 1 |
| JQ254796 | CSM1280 | 2-mid | midgut | adult worker | field caught | 1 |
| JQ254797 | CSM1280 | 2-mid | midgut | adult worker | field caught | 1 |
| JQ254798 | CSM1280 | 2-mid | midgut | adult worker | field caught | 1 |
| JQ254799 | CSM1280 | 2-mid | midgut | adult worker | field caught | 1 |
| JQ254800 | CSM1280 | 2-mid | midgut | adult worker | field caught | 1 |
| JQ254801 | CSM1280 | 2-mid | midgut | adult worker | field caught | 1 |
| JQ254802 | CSM1280 | 2-mid | midgut | adult worker | field caught | 1 |
| JQ254803 | CSM1280 | 2-mid | midgut | adult worker | field caught | 1 |
| JQ254804 | CSM1280 | 2-mid | midgut | adult worker | field caught | 1 |



|          |         |        |        |              |              |   |
|----------|---------|--------|--------|--------------|--------------|---|
| JQ254805 | CSM1280 | 2-mid  | midgut | adult worker | field caught | 1 |
| JQ254806 | CSM1280 | 2-mid  | midgut | adult worker | field caught | 1 |
| JQ254807 | CSM1280 | 2-mid  | midgut | adult worker | field caught | 1 |
| JQ254808 | CSM1280 | 2-mid  | midgut | adult worker | field caught | 1 |
| JQ254809 | CSM1280 | 2-mid  | midgut | adult worker | field caught | 1 |
| JQ254810 | CSM1280 | 2-mid  | midgut | adult worker | field caught | 1 |
| JQ254811 | CSM1280 | 2-mid  | midgut | adult worker | field caught | 1 |
| JQ254812 | CSM1280 | 2-mid  | midgut | adult worker | field caught | 1 |
| JQ254813 | CSM1280 | 2-mid  | midgut | adult worker | field caught | 1 |
| JQ254814 | CSM1280 | 2-mid  | midgut | adult worker | field caught | 1 |
| JQ254815 | CSM1280 | 2-mid  | midgut | adult worker | field caught | 1 |
| JQ254816 | CSM1280 | 2-mid  | midgut | adult worker | field caught | 1 |
| JQ254817 | CSM1280 | 2-mid  | midgut | adult worker | field caught | 1 |
| JQ254818 | CSM1280 | 2-mid  | midgut | adult worker | field caught | 1 |
| JQ254819 | CSM1280 | 2-mid  | midgut | adult worker | field caught | 1 |
| JQ254820 | CSM1280 | 2-mid  | midgut | adult worker | field caught | 1 |
| JQ254821 | CSM1280 | 2-mid  | midgut | adult worker | field caught | 1 |
| JQ254822 | CSM1280 | 2-mid  | midgut | adult worker | field caught | 1 |
| JQ254823 | CSM1280 | 2-mid  | midgut | adult worker | field caught | 1 |
| JQ254824 | CSM1280 | 2-mid  | midgut | adult worker | field caught | 1 |
| JQ254825 | CSM1280 | 2-mid  | midgut | adult worker | field caught | 1 |
| JQ254826 | CSM1280 | 2-mid  | midgut | adult worker | field caught | 1 |
| JQ254827 | CSM1280 | 2-mid  | midgut | adult worker | field caught | 1 |
| JQ254828 | CSM1280 | 2-mid  | midgut | adult worker | field caught | 1 |
| JQ254829 | CSM1280 | 2-mid  | midgut | adult worker | field caught | 1 |
| JQ254830 | CSM1280 | 2-mid  | midgut | adult worker | field caught | 1 |
| JQ254831 | CSM1280 | 2-mid  | midgut | adult worker | field caught | 1 |
| JQ254832 | CSM1280 | 2-mid  | midgut | adult worker | field caught | 1 |
| JQ254833 | CSM1280 | 2-mid  | midgut | adult worker | field caught | 1 |
| JX990223 | CSM1280 | 3-crop | crop   | adult worker | field caught | 1 |
| JX990224 | CSM1280 | 3-crop | crop   | adult worker | field caught | 1 |
| JX990225 | CSM1280 | 3-crop | crop   | adult worker | field caught | 1 |
| JX990226 | CSM1280 | 3-crop | crop   | adult worker | field caught | 1 |
| JX990227 | CSM1280 | 3-crop | crop   | adult worker | field caught | 1 |

|          |         |        |      |              |              |   |
|----------|---------|--------|------|--------------|--------------|---|
| JX990228 | CSM1280 | 3-crop | crop | adult worker | field caught | 1 |
| JX990229 | CSM1280 | 3-crop | crop | adult worker | field caught | 1 |
| JX990230 | CSM1280 | 3-crop | crop | adult worker | field caught | 1 |
| JX990231 | CSM1280 | 3-crop | crop | adult worker | field caught | 1 |
| JX990232 | CSM1280 | 3-crop | crop | adult worker | field caught | 1 |
| JX990233 | CSM1280 | 3-crop | crop | adult worker | field caught | 1 |
| JX990234 | CSM1280 | 3-crop | crop | adult worker | field caught | 1 |
| JX990235 | CSM1280 | 3-crop | crop | adult worker | field caught | 1 |
| JX990236 | CSM1280 | 3-crop | crop | adult worker | field caught | 1 |
| JX990237 | CSM1280 | 3-crop | crop | adult worker | field caught | 1 |
| JX990238 | CSM1280 | 3-crop | crop | adult worker | field caught | 1 |
| JX990239 | CSM1280 | 3-crop | crop | adult worker | field caught | 1 |
| JX990240 | CSM1280 | 3-crop | crop | adult worker | field caught | 1 |
| JX990241 | CSM1280 | 3-crop | crop | adult worker | field caught | 1 |
| JX990242 | CSM1280 | 3-crop | crop | adult worker | field caught | 1 |
| JX990243 | CSM1280 | 3-crop | crop | adult worker | field caught | 1 |
| JX990244 | CSM1280 | 3-head | head | adult worker | field caught | 1 |
| JX990245 | CSM1280 | 3-head | head | adult worker | field caught | 1 |
| JX990246 | CSM1280 | 3-head | head | adult worker | field caught | 1 |
| JX990247 | CSM1280 | 3-head | head | adult worker | field caught | 1 |
| JX990248 | CSM1280 | 3-head | head | adult worker | field caught | 1 |
| JX990249 | CSM1280 | 3-head | head | adult worker | field caught | 1 |
| JX990250 | CSM1280 | 3-head | head | adult worker | field caught | 1 |
| JX990251 | CSM1280 | 3-head | head | adult worker | field caught | 1 |
| JX990252 | CSM1280 | 3-head | head | adult worker | field caught | 1 |
| JX990253 | CSM1280 | 3-head | head | adult worker | field caught | 1 |
| JX990254 | CSM1280 | 3-head | head | adult worker | field caught | 1 |
| JX990255 | CSM1280 | 3-head | head | adult worker | field caught | 1 |
| JX990256 | CSM1280 | 3-head | head | adult worker | field caught | 1 |
| JX990257 | CSM1280 | 3-head | head | adult worker | field caught | 1 |
| JX990258 | CSM1280 | 3-head | head | adult worker | field caught | 1 |
| JX990259 | CSM1280 | 3-head | head | adult worker | field caught | 1 |
| JX990260 | CSM1280 | 3-head | head | adult worker | field caught | 1 |
| JX990261 | CSM1280 | 3-head | head | adult worker | field caught | 1 |

|          |         |        |         |              |              |   |
|----------|---------|--------|---------|--------------|--------------|---|
| JX990262 | CSM1280 | 3-head | head    | adult worker | field caught | 1 |
| JX990263 | CSM1280 | 3-head | head    | adult worker | field caught | 1 |
| JX990264 | CSM1280 | 3-head | head    | adult worker | field caught | 1 |
| JX990265 | CSM1280 | 3-head | head    | adult worker | field caught | 1 |
| JX990266 | CSM1280 | 3-head | head    | adult worker | field caught | 1 |
| JX990267 | CSM1280 | 3-head | head    | adult worker | field caught | 1 |
| JX990268 | CSM1280 | 3-head | head    | adult worker | field caught | 1 |
| JX990269 | CSM1280 | 3-head | head    | adult worker | field caught | 1 |
| JX990270 | CSM1280 | 3-head | head    | adult worker | field caught | 1 |
| JX990271 | CSM1280 | 3-head | head    | adult worker | field caught | 1 |
| JX990272 | CSM1280 | 3-head | head    | adult worker | field caught | 1 |
| JX990273 | CSM1280 | 3-head | head    | adult worker | field caught | 1 |
| JX990274 | CSM1280 | 3-head | head    | adult worker | field caught | 1 |
| JX990275 | CSM1280 | 3-head | head    | adult worker | field caught | 1 |
| JQ254834 | CSM1280 | 3-hind | hindgut | adult worker | field caught | 1 |
| JQ254835 | CSM1280 | 3-hind | hindgut | adult worker | field caught | 1 |
| JQ254836 | CSM1280 | 3-hind | hindgut | adult worker | field caught | 1 |
| JQ254837 | CSM1280 | 3-hind | hindgut | adult worker | field caught | 1 |
| JX990276 | CSM1280 | 3-hind | hindgut | adult worker | field caught | 1 |
| JQ254838 | CSM1280 | 3-hind | hindgut | adult worker | field caught | 1 |
| JQ254839 | CSM1280 | 3-hind | hindgut | adult worker | field caught | 1 |
| JQ254840 | CSM1280 | 3-hind | hindgut | adult worker | field caught | 1 |
| JQ254841 | CSM1280 | 3-hind | hindgut | adult worker | field caught | 1 |
| JQ254842 | CSM1280 | 3-hind | hindgut | adult worker | field caught | 1 |
| JQ254843 | CSM1280 | 3-hind | hindgut | adult worker | field caught | 1 |
| JQ254844 | CSM1280 | 3-hind | hindgut | adult worker | field caught | 1 |
| JQ254845 | CSM1280 | 3-hind | hindgut | adult worker | field caught | 1 |
| JQ254846 | CSM1280 | 3-hind | hindgut | adult worker | field caught | 1 |
| JQ254847 | CSM1280 | 3-hind | hindgut | adult worker | field caught | 1 |
| JQ254848 | CSM1280 | 3-hind | hindgut | adult worker | field caught | 1 |
| JX990277 | CSM1280 | 3-hind | hindgut | adult worker | field caught | 1 |
| JQ254849 | CSM1280 | 3-hind | hindgut | adult worker | field caught | 1 |
| JQ254850 | CSM1280 | 3-hind | hindgut | adult worker | field caught | 1 |
| JQ254851 | CSM1280 | 3-hind | hindgut | adult worker | field caught | 1 |

|          |         |        |                           |               |                         |   |
|----------|---------|--------|---------------------------|---------------|-------------------------|---|
| JX990278 | CSM1280 | 3-hind | hindgut                   | adult worker  | field caught            | 1 |
| JQ254852 | CSM1280 | 3-hind | hindgut                   | adult worker  | field caught            | 1 |
| JQ254853 | CSM1280 | 3-hind | hindgut                   | adult worker  | field caught            | 1 |
| JQ254854 | CSM1280 | 3-hind | hindgut                   | adult worker  | field caught            | 1 |
| JQ254855 | CSM1280 | 3-hind | hindgut                   | adult worker  | field caught            | 1 |
| JQ254856 | CSM1280 | 3-hind | hindgut                   | adult worker  | field caught            | 1 |
| JQ254857 | CSM1280 | 3-hind | hindgut                   | adult worker  | field caught            | 1 |
| JQ254858 | CSM1280 | 3-hind | hindgut                   | adult worker  | field caught            | 1 |
| JQ254859 | CSM1280 | 3-hind | hindgut                   | adult worker  | field caught            | 1 |
| JQ254860 | CSM1280 | 3-hind | hindgut                   | adult worker  | field caught            | 1 |
| JQ254861 | CSM1280 | 3-hind | hindgut                   | adult worker  | field caught            | 1 |
| JQ254862 | CSM1280 | 3-hind | hindgut                   | adult worker  | field caught            | 1 |
| JQ254863 | CSM1280 | 3-hind | hindgut                   | adult worker  | field caught            | 1 |
| JQ254864 | CSM1280 | 3-hind | hindgut                   | adult worker  | field caught            | 1 |
| JQ254865 | CSM1280 | 3-hind | hindgut                   | adult worker  | field caught            | 1 |
| JX990279 | CSM1280 | 3-mid  | hindgut                   | adult worker  | field caught            | 1 |
| JQ254866 | CSM1280 | 3-mid  | midgut                    | adult worker  | field caught            | 1 |
| JQ254867 | CSM1280 | 3-mid  | midgut                    | adult worker  | field caught            | 1 |
| JQ254868 | CSM1280 | 3-mid  | midgut                    | adult worker  | field caught            | 1 |
| JQ254869 | CSM1280 | 3-mid  | midgut                    | adult worker  | field caught            | 1 |
| JQ254870 | CSM1280 | 3-mid  | midgut                    | adult worker  | field caught            | 1 |
| JX990280 | CSM1280 | 3-mid  | hindgut                   | adult worker  | field caught            | 1 |
| JQ254871 | CSM1280 | 3-mid  | midgut                    | adult worker  | field caught            | 1 |
| JQ254872 | CSM1280 | 3-mid  | midgut                    | adult worker  | field caught            | 1 |
| JQ254873 | CSM1280 | 3-mid  | midgut                    | adult worker  | field caught            | 1 |
| JQ254874 | CSM1280 | 3-mid  | midgut                    | adult worker  | field caught            | 1 |
| JQ254875 | CSM1280 | 3-mid  | midgut                    | adult worker  | field caught            | 1 |
| JQ254876 | CSM1280 | 3-mid  | midgut                    | adult worker  | field caught            | 1 |
| JQ254877 | CSM1280 | 3-mid  | midgut                    | adult worker  | field caught            | 1 |
| JQ254878 | CSM1280 | 3-mid  | midgut                    | adult worker  | field caught            | 1 |
| JQ254879 | CSM1280 | 3-mid  | midgut                    | adult worker  | field caught            | 1 |
| JQ254880 | CSM1280 | 3-mid  | midgut                    | adult worker  | field caught            | 1 |
| JQ254882 | CSM1280 | 3-mid  | midgut                    | adult worker  | field caught            | 1 |
| JQ254290 | CSM1323 |        | crop, mid-, and hind-guts | adult workers | lab reared for 14 weeks | 3 |





|          |         |      |               |                         |   |
|----------|---------|------|---------------|-------------------------|---|
| JX990328 | CSM1323 | legs | adult workers | lab reared for 14 weeks | 3 |
| JX990329 | CSM1323 | legs | adult workers | lab reared for 14 weeks | 3 |
| JX990330 | CSM1323 | legs | adult workers | lab reared for 14 weeks | 3 |
| JX990331 | CSM1323 | legs | adult workers | lab reared for 14 weeks | 3 |
| JX990332 | CSM1323 | legs | adult workers | lab reared for 14 weeks | 3 |
| JX990333 | CSM1323 | legs | adult workers | lab reared for 14 weeks | 3 |
| JX990334 | CSM1323 | legs | adult workers | lab reared for 14 weeks | 3 |

Cultivated bacteria

|          |         |                    |               |                         |   |
|----------|---------|--------------------|---------------|-------------------------|---|
| JX990131 | CSM1235 | head of queen      | adult worker  | lab reared for 26 weeks | 1 |
| JX990132 | CSM1235 | infrabuccal pocket | adult worker  | lab reared for 26 weeks | 1 |
| JX990133 | CSM1235 | infrabuccal pocket | adult worker  | lab reared for 26 weeks | 1 |
| JX990134 | CSM1235 | head of worker     | adult worker  | lab reared for 26 weeks | 1 |
| JX990135 | CSM1235 | head of queen      | queen         | lab reared for 26 weeks | 1 |
| JX990136 | CSM1235 | hindgut of worker  | adult worker  | lab reared for 26 weeks | 1 |
| JX990137 | CSM1235 | midgut of worker   | adult worker  | lab reared for 26 weeks | 1 |
| JX990138 | CSM1235 | head of worker     | adult worker  | lab reared for 26 weeks | 1 |
| JX990139 | CSM1235 | head of worker     | adult worker  | lab reared for 26 weeks | 1 |
| JX990140 | CSM1235 | head of worker     | adult worker  | lab reared for 26 weeks | 1 |
| JX990141 | CSM1235 | head of worker     | adult worker  | lab reared for 26 weeks | 1 |
| JX990142 | CSM1235 | infrabuccal pocket | adult worker  | lab reared for 26 weeks | 1 |
| JX990143 | CSM1235 | infrabuccal pocket | adult worker  | lab reared for 26 weeks | 1 |
| JX990144 | CSM1235 | infrabuccal pocket | adult worker  | lab reared for 26 weeks | 1 |
| JX990145 | CSM1235 | infrabuccal pocket | adult worker  | lab reared for 26 weeks | 1 |
| JX990146 | CSM1396 | guts               | adult workers | lab reared for 14 weeks | 3 |
| JX990147 | CSM1396 | guts               | adult workers | lab reared for 14 weeks | 3 |
| JX990148 | CSM1396 | heads              | adult workers | lab reared for 14 weeks | 3 |
| JX990149 | CSM1235 | head               | adult worker  | lab reared for 26 weeks | 1 |
| JX990150 | CSM1235 | head               | adult worker  | lab reared for 26 weeks | 1 |
| JX990151 | CSM1235 | head               | adult worker  | lab reared for 26 weeks | 1 |
| JX990152 | CSM1235 | head               | adult worker  | lab reared for 26 weeks | 1 |
| JX990153 | CSM1235 | head               | adult worker  | lab reared for 26 weeks | 1 |
| JX990154 | CSM1235 | head               | adult worker  | lab reared for 26 weeks | 1 |
| JX990155 | CSM1235 | head               | adult worker  | lab reared for 26 weeks | 1 |

|          |         |      |              |                         |   |
|----------|---------|------|--------------|-------------------------|---|
| JX990156 | CSM1235 | head | adult worker | lab reared for 26 weeks | 1 |
| JX990157 | CSM1235 | head | adult worker | lab reared for 26 weeks | 1 |
| JX990158 | CSM1235 | head | adult worker | lab reared for 26 weeks | 1 |
| JX990159 | CSM1235 | head | adult worker | lab reared for 26 weeks | 1 |
| JX990160 | CSM1235 | head | adult worker | lab reared for 26 weeks | 1 |
| JX990161 | CSM1235 | head | adult worker | lab reared for 26 weeks | 1 |
| JX990162 | CSM1323 | head | adult worker | lab reared for 14 weeks | 1 |
| JX990163 | CSM1323 | head | adult worker | lab reared for 14 weeks | 1 |
| JX990164 | CSM1323 | head | adult worker | lab reared for 14 weeks | 1 |



Table S2. continued

| Accession | Full Sequence Read ID | Domain   | Phylum          | Class               | Order              |
|-----------|-----------------------|----------|-----------------|---------------------|--------------------|
| JQ254320  | CSM1235-gut-1-a       | Bacteria | Proteobacteria  | Alphaproteobacteria | Rhizobiales        |
| JQ254321  | CSM1235-gut-1-aaa     | Bacteria | Bacteroidetes   | Sphingobacteria     | Sphingobacteriales |
| JQ254322  | CSM1235-gut-1-b       | Bacteria | Proteobacteria  | Alphaproteobacteria | Rhizobiales        |
| JQ254323  | CSM1235-gut-1-bb      | Bacteria | Proteobacteria  | Betaproteobacteria  | Burkholderiales    |
| JQ254324  | CSM1235-gut-1-bbb     | Bacteria | Proteobacteria  | Alphaproteobacteria | Rhizobiales        |
| JQ254325  | CSM1235-gut-1-c       | Bacteria | Proteobacteria  | Alphaproteobacteria | Rhizobiales        |
| JQ254326  | CSM1235-gut-1-ccc     | Bacteria | Proteobacteria  | Betaproteobacteria  | Burkholderiales    |
| JQ254327  | CSM1235-gut-1-d       | Bacteria | Proteobacteria  | Alphaproteobacteria | Rhizobiales        |
| JQ254328  | CSM1235-gut-1-ddd     | Bacteria | Proteobacteria  | Alphaproteobacteria | Rhizobiales        |
| JQ254329  | CSM1235-gut-1-ee      | Bacteria | Proteobacteria  | Betaproteobacteria  | Burkholderiales    |
| JQ254330  | CSM1235-gut-1-eee     | Bacteria | Verrucomicrobia | Opitutae            | Opitales           |
| JQ254331  | CSM1235-gut-1-f       | Bacteria | Actinobacteria  | Actinobacteria      | Actinomycetales    |
| JQ254332  | CSM1235-gut-1-g       | Bacteria | Proteobacteria  | Alphaproteobacteria | Rhizobiales        |
| JQ254333  | CSM1235-gut-1-gg      | Bacteria | Verrucomicrobia | Opitutae            | Opitales           |
| JQ254334  | CSM1235-gut-1-h       | Bacteria | Proteobacteria  | Alphaproteobacteria | Rhizobiales        |
| JX990165  | CSM1235-gut-1-hh      | Bacteria | Proteobacteria  | Alphaproteobacteria | Rhizobiales        |
| JQ254335  | CSM1235-gut-1-hhh     | Bacteria | Proteobacteria  | Alphaproteobacteria | Rhizobiales        |
| JQ254336  | CSM1235-gut-1-i       | Bacteria | Proteobacteria  | Betaproteobacteria  | Burkholderiales    |
| JQ254337  | CSM1235-gut-1-ii      | Bacteria | Proteobacteria  | Betaproteobacteria  | Burkholderiales    |
| JQ254338  | CSM1235-gut-1-iii     | Bacteria | Proteobacteria  | Alphaproteobacteria | Rhizobiales        |
| JQ254339  | CSM1235-gut-1-j       | Bacteria | Verrucomicrobia | Opitutae            | Opitales           |
| JQ254340  | CSM1235-gut-1-jj      | Bacteria | Proteobacteria  | Alphaproteobacteria |                    |
| JQ254341  | CSM1235-gut-1-jjj     | Bacteria | Proteobacteria  | Alphaproteobacteria | Rhizobiales        |
| JQ254342  | CSM1235-gut-1-kk      | Bacteria | Proteobacteria  | Betaproteobacteria  | Burkholderiales    |
| JQ254343  | CSM1235-gut-1-kkk     | Bacteria | Proteobacteria  | Alphaproteobacteria | Rhizobiales        |

|          |                   |          |                 |                     |                 |
|----------|-------------------|----------|-----------------|---------------------|-----------------|
| JQ254344 | CSM1235-gut-1-l   | Bacteria | Proteobacteria  | Alphaproteobacteria | Rhizobiales     |
| JQ254345 | CSM1235-gut-1-ll  | Bacteria | Proteobacteria  | Alphaproteobacteria | Rhizobiales     |
| JX990166 | CSM1235-gut-1-lll | Bacteria | Proteobacteria  | Alphaproteobacteria | Rhizobiales     |
| JQ254346 | CSM1235-gut-1-m   | Bacteria |                 |                     |                 |
| JQ254347 | CSM1235-gut-1-mm  | Bacteria | Verrucomicrobia | Opitutae            | Opitales        |
| JQ254348 | CSM1235-gut-1-nn  | Bacteria | Proteobacteria  | Alphaproteobacteria | Rhizobiales     |
| JQ254349 | CSM1235-gut-1-o   | Bacteria |                 |                     |                 |
| JQ254350 | CSM1235-gut-1-oo  | Bacteria | Verrucomicrobia | Opitutae            | Opitales        |
| JQ254351 | CSM1235-gut-1-q   | Bacteria | Proteobacteria  | Alphaproteobacteria | Rhizobiales     |
| JQ254352 | CSM1235-gut-1-qq  | Bacteria | Proteobacteria  | Alphaproteobacteria | Rhizobiales     |
| JX990167 | CSM1235-gut-1-r   | Bacteria | Proteobacteria  | Alphaproteobacteria | Rhodobacterales |
| JQ254353 | CSM1235-gut-1-rr  | Bacteria | Proteobacteria  | Alphaproteobacteria | Rhizobiales     |
| JQ254354 | CSM1235-gut-1-s   | Bacteria | Proteobacteria  | Alphaproteobacteria | Rhizobiales     |
| JQ254355 | CSM1235-gut-1-ss  | Bacteria | Verrucomicrobia | Opitutae            | Opitales        |
| JQ254356 | CSM1235-gut-1-t   | Bacteria | Proteobacteria  | Alphaproteobacteria | Rhizobiales     |
| JQ254357 | CSM1235-gut-1-tt  | Bacteria | Proteobacteria  | Alphaproteobacteria | Rhizobiales     |
| JQ254358 | CSM1235-gut-1-uu  | Bacteria | Proteobacteria  | Alphaproteobacteria | Rhizobiales     |
| JX990168 | CSM1235-gut-1-v   | Bacteria | Proteobacteria  | Alphaproteobacteria | Rhizobiales     |
| JQ254359 | CSM1235-gut-1-vv  | Bacteria | Proteobacteria  | Alphaproteobacteria | Rhizobiales     |
| JQ254360 | CSM1235-gut-1-x   | Bacteria | Proteobacteria  | Alphaproteobacteria | Rhizobiales     |
| JQ254361 | CSM1235-gut-1-xx  | Bacteria | Proteobacteria  | Alphaproteobacteria | Rhizobiales     |
| JQ254362 | CSM1235-gut-1-y   | Bacteria | Proteobacteria  | Alphaproteobacteria | Rhizobiales     |
| JQ254363 | CSM1235-gut-1-yy  | Bacteria | Proteobacteria  | Alphaproteobacteria | Rhizobiales     |
| JQ254364 | CSM1235-gut-1-z   | Bacteria | Proteobacteria  | Alphaproteobacteria | Rhizobiales     |
| JQ254645 | CSM1280-1-wk-a    | Bacteria | Verrucomicrobia | Opitutae            | Opitales        |
| JQ254646 | CSM1280-1-wk-c    | Bacteria | Proteobacteria  | Gammaproteobacteria | Xanthomonadales |
| JQ254647 | CSM1280-1-wk-d    | Bacteria | Verrucomicrobia | Opitutae            | Opitales        |
| JX990169 | CSM1280-1-wk-e    | Bacteria | Proteobacteria  | Betaproteobacteria  | Burkholderiales |
| JQ254648 | CSM1280-1-wk-f    | Bacteria | Verrucomicrobia | Opitutae            | Opitales        |
| JQ254649 | CSM1280-1-wk-g    | Bacteria | Verrucomicrobia | Opitutae            | Opitales        |
| JQ254650 | CSM1280-1-wk-h    | Bacteria | Proteobacteria  | Alphaproteobacteria | Rhizobiales     |
| JQ254651 | CSM1280-1-wk-i    | Bacteria | Proteobacteria  | Alphaproteobacteria | Rhizobiales     |
| JQ254652 | CSM1280-1-wk-j    | Bacteria | Proteobacteria  | Alphaproteobacteria | Rhizobiales     |
| JQ254653 | CSM1280-1-wk-k    | Bacteria | Proteobacteria  | Alphaproteobacteria | Rhizobiales     |

|          |                  |          |                 |                       |                    |
|----------|------------------|----------|-----------------|-----------------------|--------------------|
| JQ254654 | CSM1280-1-wk-z01 | Bacteria | Proteobacteria  | Gammaproteobacteria   | Xanthomonadales    |
| JQ254655 | CSM1280-1-wk-z02 | Bacteria | Proteobacteria  | Gammaproteobacteria   | Xanthomonadales    |
| JQ254656 | CSM1280-1-wk-z03 | Bacteria | Proteobacteria  | Gammaproteobacteria   | Xanthomonadales    |
| JQ254657 | CSM1280-1-wk-z04 | Bacteria | Proteobacteria  | Betaproteobacteria    | Burkholderiales    |
| JQ254658 | CSM1280-1-wk-z05 | Bacteria | Proteobacteria  | Epsilonproteobacteria | Campylobacterales  |
| JQ254659 | CSM1280-1-wk-z06 | Bacteria | Verrucomicrobia | Opitutae              | Opitales           |
| JQ254660 | CSM1280-1-wk-z07 | Bacteria | Proteobacteria  | Betaproteobacteria    | Burkholderiales    |
| JQ254661 | CSM1280-1-wk-z08 | Bacteria | Proteobacteria  | Betaproteobacteria    | Burkholderiales    |
| JX990170 | CSM1280-1-wk-z09 | Bacteria | Proteobacteria  | Betaproteobacteria    | Burkholderiales    |
| JQ254662 | CSM1280-1-wk-z10 | Bacteria | Bacteroidetes   | Sphingobacteria       | Sphingobacteriales |
| JQ254663 | CSM1280-1-wk-z11 | Bacteria | Proteobacteria  | Gammaproteobacteria   | Xanthomonadales    |
| JQ254664 | CSM1280-1-wk-z12 | Bacteria | Proteobacteria  | Gammaproteobacteria   | Xanthomonadales    |
| JQ254665 | CSM1280-1-wk-z13 | Bacteria | Proteobacteria  | Alphaproteobacteria   | Rhizobiales        |
| JQ254666 | CSM1280-1-wk-z14 | Bacteria | Proteobacteria  | Betaproteobacteria    | Burkholderiales    |
| JQ254667 | CSM1280-1-wk-z15 | Bacteria | Proteobacteria  | Betaproteobacteria    | Burkholderiales    |
| JQ254668 | CSM1280-1-wk-z16 | Bacteria | Bacteroidetes   | Sphingobacteria       | Sphingobacteriales |
| JQ254669 | CSM1280-1-wk-z17 | Bacteria | Proteobacteria  | Betaproteobacteria    | Burkholderiales    |
| JQ254670 | CSM1280-1-wk-z19 | Bacteria | Bacteroidetes   | Sphingobacteria       | Sphingobacteriales |
| JQ254671 | CSM1280-1-wk-z20 | Bacteria | Proteobacteria  | Gammaproteobacteria   | Xanthomonadales    |
| JX990171 | CSM1280-1-wk-z21 | Bacteria | Proteobacteria  | Betaproteobacteria    | Burkholderiales    |
| JQ254672 | CSM1280-1-wk-z22 | Bacteria | Proteobacteria  | Gammaproteobacteria   | Xanthomonadales    |
| JQ254673 | CSM1280-1-wk-z23 | Bacteria | Proteobacteria  | Gammaproteobacteria   | Xanthomonadales    |
| JQ254674 | CSM1280-1-wk-z24 | Bacteria | Proteobacteria  | Epsilonproteobacteria | Campylobacterales  |
| JQ254675 | CSM1280-1-wk-z25 | Bacteria | Proteobacteria  | Gammaproteobacteria   | Xanthomonadales    |
| JQ254676 | CSM1280-1-wk-z26 | Bacteria | Proteobacteria  | Alphaproteobacteria   | Rhizobiales        |
| JQ254677 | CSM1280-1-wk-z27 | Bacteria | Proteobacteria  | Gammaproteobacteria   | Xanthomonadales    |
| JQ254678 | CSM1280-1-wk-z28 | Bacteria | Proteobacteria  | Alphaproteobacteria   | Rhizobiales        |
| JQ254679 | CSM1280-1-wk-z29 | Bacteria | Proteobacteria  | Alphaproteobacteria   | Rhizobiales        |
| JQ254680 | CSM1280-1-wk-z30 | Bacteria | Proteobacteria  | Gammaproteobacteria   |                    |
| JQ254681 | CSM1280-1-wk-z31 | Bacteria | Proteobacteria  | Betaproteobacteria    | Burkholderiales    |
| JQ254682 | CSM1280-1-wk-z32 | Bacteria | Proteobacteria  | Betaproteobacteria    | Burkholderiales    |
| JQ254683 | CSM1280-1-wk-z33 | Bacteria | Proteobacteria  | Gammaproteobacteria   | Xanthomonadales    |
| JQ254684 | CSM1280-1-wk-z34 | Bacteria | Proteobacteria  | Gammaproteobacteria   | Xanthomonadales    |
| JQ254685 | CSM1280-1-wk-z35 | Bacteria | Proteobacteria  | Betaproteobacteria    | Burkholderiales    |

|          |                  |          |                 |                       |                   |
|----------|------------------|----------|-----------------|-----------------------|-------------------|
| JQ254686 | CSM1280-1-wk-z36 | Bacteria | Proteobacteria  | Betaproteobacteria    | Burkholderiales   |
| JQ254687 | CSM1280-1-wk-z37 | Bacteria | Proteobacteria  | Gammaproteobacteria   | Xanthomonadales   |
| JQ254688 | CSM1280-1-wk-z38 | Bacteria | Proteobacteria  | Gammaproteobacteria   |                   |
| JQ254689 | CSM1280-1-wk-z39 | Bacteria | Proteobacteria  | Betaproteobacteria    | Burkholderiales   |
| JQ254690 | CSM1280-1-wk-z40 | Bacteria | Proteobacteria  | Epsilonproteobacteria | Campylobacterales |
| JQ254691 | CSM1280-1-wk-z41 | Bacteria | Proteobacteria  | Alphaproteobacteria   | Rhizobiales       |
| JQ254692 | CSM1280-1-wk-z42 | Bacteria | Proteobacteria  | Gammaproteobacteria   | Xanthomonadales   |
| JQ254693 | CSM1280-1-wk-z43 | Bacteria | Proteobacteria  | Alphaproteobacteria   | Rhizobiales       |
| JQ254694 | CSM1280-1-wk-z44 | Bacteria | Proteobacteria  | Alphaproteobacteria   | Rhizobiales       |
| JQ254695 | CSM1280-1-wk-z45 | Bacteria | Proteobacteria  | Gammaproteobacteria   | Xanthomonadales   |
| JQ254696 | CSM1280-1-wk-z46 | Bacteria | Proteobacteria  | Gammaproteobacteria   | Xanthomonadales   |
| JQ254697 | CSM1280-1-wk-z47 | Bacteria | Proteobacteria  | Gammaproteobacteria   | Xanthomonadales   |
| JQ254698 | CSM1280-1-wk-z48 | Bacteria | Proteobacteria  | Gammaproteobacteria   | Xanthomonadales   |
| JQ254699 | CSM1280-1-wk-z49 | Bacteria | Proteobacteria  | Betaproteobacteria    | Burkholderiales   |
| JQ254700 | CSM1280-1-wk-z50 | Bacteria | Proteobacteria  | Betaproteobacteria    | Burkholderiales   |
| JQ254701 | CSM1280-1-wk-z51 | Bacteria | Proteobacteria  | Gammaproteobacteria   | Xanthomonadales   |
| JQ254702 | CSM1280-1-wk-z52 | Bacteria | Proteobacteria  | Epsilonproteobacteria | Campylobacterales |
| JQ254703 | CSM1280-1-wk-z53 | Bacteria | Proteobacteria  | Alphaproteobacteria   | Rhizobiales       |
| JQ254704 | CSM1280-1-wk-z54 | Bacteria | Proteobacteria  | Gammaproteobacteria   |                   |
| JQ254705 | CSM1280-1-wk-z55 | Bacteria | Proteobacteria  | Alphaproteobacteria   | Rhizobiales       |
| JQ254706 | CSM1280-1-wk-z56 | Bacteria | Proteobacteria  | Betaproteobacteria    | Burkholderiales   |
| JQ254707 | CSM1280-1-wk-z57 | Bacteria | Proteobacteria  | Alphaproteobacteria   | Rhizobiales       |
| JQ254708 | CSM1280-1-wk-z58 | Bacteria | Proteobacteria  | Betaproteobacteria    | Burkholderiales   |
| JQ254709 | CSM1280-1-wk-z59 | Bacteria | Proteobacteria  | Epsilonproteobacteria | Campylobacterales |
| JQ254710 | CSM1280-1-wk-z60 | Bacteria | Proteobacteria  | Alphaproteobacteria   | Rhizobiales       |
| JQ254711 | CSM1280-1-wk-z61 | Bacteria | Proteobacteria  | Gammaproteobacteria   | Xanthomonadales   |
| JQ254712 | CSM1280-1-wk-z62 | Bacteria | Proteobacteria  | Betaproteobacteria    | Burkholderiales   |
| JQ254713 | CSM1280-1-wk-z63 | Bacteria | Proteobacteria  | Alphaproteobacteria   | Rhizobiales       |
| JQ254714 | CSM1280-1-wk-z64 | Bacteria | Proteobacteria  | Gammaproteobacteria   |                   |
| JQ254715 | CSM1280-1-wk-z65 | Bacteria | Bacteroidetes   | Flavobacteria         | Flavobacteriales  |
| JQ254716 | CSM1280-1-wk-z66 | Bacteria | Verrucomicrobia | Opitutae              | Opitiales         |
| JQ254717 | CSM1280-1-wk-z67 | Bacteria | Proteobacteria  | Alphaproteobacteria   | Rhizobiales       |
| JQ254718 | CSM1280-1-wk-z68 | Bacteria | Proteobacteria  | Gammaproteobacteria   |                   |
| JQ254719 | CSM1280-1-wk-z70 | Bacteria | Proteobacteria  | Epsilonproteobacteria | Campylobacterales |

|          |                   |          |                |                     |                 |
|----------|-------------------|----------|----------------|---------------------|-----------------|
| JQ254720 | CSM1280-1-wk-z71  | Bacteria | Proteobacteria | Gammaproteobacteria |                 |
| JQ254721 | CSM1280-1-wk-z72  | Bacteria | Proteobacteria | Gammaproteobacteria | Xanthomonadales |
| JQ254722 | CSM1280-1-wk-z73  | Bacteria | Proteobacteria | Alphaproteobacteria | Rhizobiales     |
| JQ254723 | CSM1280-1-wk-z74  | Bacteria | Proteobacteria | Betaproteobacteria  | Burkholderiales |
| JQ254724 | CSM1280-1-wk-z75  | Bacteria | Proteobacteria | Betaproteobacteria  | Burkholderiales |
| JQ254725 | CSM1280-1-wk-z76  | Bacteria | Proteobacteria | Betaproteobacteria  | Burkholderiales |
| JQ254726 | CSM1280-1-wk-z77  | Bacteria | Proteobacteria | Alphaproteobacteria | Rhizobiales     |
| JQ254727 | CSM1280-1-wk-z78  | Bacteria | Proteobacteria | Betaproteobacteria  | Burkholderiales |
| JQ254728 | CSM1280-1-wk-z79  | Bacteria | Proteobacteria | Alphaproteobacteria | Rhizobiales     |
| JQ254729 | CSM1280-1-wk-z80  | Bacteria | Proteobacteria | Gammaproteobacteria | Xanthomonadales |
| JQ254730 | CSM1280-1-wk-z81  | Bacteria | Proteobacteria | Betaproteobacteria  | Burkholderiales |
| JQ254731 | CSM1280-1-wk-z82  | Bacteria | Proteobacteria | Betaproteobacteria  | Burkholderiales |
| JQ254732 | CSM1280-1-wk-z83  | Bacteria | Proteobacteria | Betaproteobacteria  | Burkholderiales |
| JQ254733 | CSM1280-1-wk-z84  | Bacteria | Proteobacteria | Gammaproteobacteria | Xanthomonadales |
| JQ254734 | CSM1280-1-wk-z85  | Bacteria | Proteobacteria | Alphaproteobacteria | Rhizobiales     |
| JQ254735 | CSM1280-1-wk-z86  | Bacteria | Proteobacteria | Gammaproteobacteria |                 |
| JQ254736 | CSM1280-1-wk-z87  | Bacteria | Proteobacteria | Gammaproteobacteria |                 |
| JQ254737 | CSM1280-1-wk-z88  | Bacteria | Proteobacteria | Betaproteobacteria  | Burkholderiales |
| JX990172 | CSM1280-1-wk-z89  | Bacteria | Proteobacteria | Betaproteobacteria  | Burkholderiales |
| JQ254738 | CSM1280-1-wk-z90  | Bacteria | Proteobacteria | Gammaproteobacteria | Xanthomonadales |
| JQ254739 | CSM1280-1-wk-z91  | Bacteria | Proteobacteria | Alphaproteobacteria | Rhizobiales     |
| JQ254740 | CSM1280-1-wk-z92  | Bacteria | Proteobacteria | Betaproteobacteria  | Burkholderiales |
| JQ254741 | CSM1280-1-wk-z93  | Bacteria | Proteobacteria | Gammaproteobacteria |                 |
| JQ254742 | CSM1280-1-wk-z94  | Bacteria | Proteobacteria | Betaproteobacteria  | Burkholderiales |
| JQ254743 | CSM1280-1-wk-z95  | Bacteria | Proteobacteria | Gammaproteobacteria |                 |
| JQ254744 | CSM1280-1-wk-z96  | Bacteria | Proteobacteria | Betaproteobacteria  | Burkholderiales |
| JX990173 | CSM1280-2-crop-a  | Bacteria | Proteobacteria | Alphaproteobacteria | Rhizobiales     |
| JX990174 | CSM1280-2-crop-aa | Bacteria | Proteobacteria | Alphaproteobacteria | Rhizobiales     |
| JX990175 | CSM1280-2-crop-b  | Bacteria | Proteobacteria | Alphaproteobacteria | Rhizobiales     |
| JX990176 | CSM1280-2-crop-bb | Bacteria | Proteobacteria | Alphaproteobacteria | Rhizobiales     |
| JX990177 | CSM1280-2-crop-c  | Bacteria | Proteobacteria | Alphaproteobacteria | Rhizobiales     |
| JX990178 | CSM1280-2-crop-cc | Bacteria | Proteobacteria | Alphaproteobacteria | Rhizobiales     |
| JX990179 | CSM1280-2-crop-d  | Bacteria | Proteobacteria | Alphaproteobacteria | Rhizobiales     |
| JX990180 | CSM1280-2-crop-dd | Bacteria | Proteobacteria | Alphaproteobacteria | Rhizobiales     |

|          |                   |          |                |                       |                   |
|----------|-------------------|----------|----------------|-----------------------|-------------------|
| JX990181 | CSM1280-2-crop-e  | Bacteria | Proteobacteria | Alphaproteobacteria   | Rhizobiales       |
| JX990182 | CSM1280-2-crop-ee | Bacteria | Proteobacteria | Alphaproteobacteria   | Rhizobiales       |
| JX990183 | CSM1280-2-crop-f  | Bacteria | Proteobacteria | Alphaproteobacteria   | Rhizobiales       |
| JX990184 | CSM1280-2-crop-i  | Bacteria | Proteobacteria | Alphaproteobacteria   | Rhizobiales       |
| JX990185 | CSM1280-2-crop-j  | Bacteria | Proteobacteria | Alphaproteobacteria   | Rhizobiales       |
| JX990186 | CSM1280-2-crop-k  | Bacteria | Proteobacteria | Alphaproteobacteria   | Rhizobiales       |
| JX990187 | CSM1280-2-crop-m  | Bacteria | Proteobacteria | Alphaproteobacteria   | Rhizobiales       |
| JX990188 | CSM1280-2-crop-n  | Bacteria | Proteobacteria | Alphaproteobacteria   | Rhizobiales       |
| JX990189 | CSM1280-2-crop-o  | Bacteria | Proteobacteria | Alphaproteobacteria   | Rhizobiales       |
| JX990190 | CSM1280-2-crop-p  | Bacteria | Proteobacteria | Alphaproteobacteria   | Rhizobiales       |
| JX990191 | CSM1280-2-crop-r  | Bacteria | Proteobacteria | Gammaproteobacteria   | Xanthomonadales   |
| JX990192 | CSM1280-2-crop-s  | Bacteria | Proteobacteria | Alphaproteobacteria   | Rhizobiales       |
| JX990193 | CSM1280-2-crop-t  | Bacteria | Proteobacteria | Alphaproteobacteria   | Rhizobiales       |
| JX990194 | CSM1280-2-crop-u  | Bacteria | Proteobacteria | Alphaproteobacteria   | Rhizobiales       |
| JX990195 | CSM1280-2-crop-v  | Bacteria | Proteobacteria | Alphaproteobacteria   | Rhizobiales       |
| JX990196 | CSM1280-2-crop-w  | Bacteria | Proteobacteria | Alphaproteobacteria   | Rhizobiales       |
| JX990197 | CSM1280-2-crop-x  | Bacteria | Proteobacteria | Alphaproteobacteria   | Rhizobiales       |
| JX990198 | CSM1280-2-crop-y  | Bacteria | Proteobacteria | Alphaproteobacteria   | Rhizobiales       |
| JX990199 | CSM1280-2-crop-z  | Bacteria | Proteobacteria | Alphaproteobacteria   | Rhizobiales       |
| JX990200 | CSM1280-2-head-c  | Bacteria | Bacteroidetes  | Flavobacteria         | Flavobacteriales  |
| JX990201 | CSM1280-2-head-d  | Bacteria | Proteobacteria | Betaproteobacteria    | Burkholderiales   |
| JX990202 | CSM1280-2-head-e  | Bacteria | Proteobacteria | Alphaproteobacteria   | Rhizobiales       |
| JX990203 | CSM1280-2-head-f  | Bacteria | Proteobacteria | Epsilonproteobacteria | Campylobacterales |
| JX990204 | CSM1280-2-head-g  | Bacteria | Proteobacteria | Gammaproteobacteria   | Xanthomonadales   |
| JX990205 | CSM1280-2-head-h  | Bacteria | Proteobacteria | Alphaproteobacteria   | Rhizobiales       |
| JX990206 | CSM1280-2-head-k  | Bacteria | Proteobacteria | Gammaproteobacteria   | Xanthomonadales   |
| JX990207 | CSM1280-2-head-p  | Bacteria | Proteobacteria | Gammaproteobacteria   | Xanthomonadales   |
| JX990208 | CSM1280-2-head-q  | Bacteria | Proteobacteria | Betaproteobacteria    | Burkholderiales   |
| JX990209 | CSM1280-2-head-qq | Bacteria | Proteobacteria | Gammaproteobacteria   | Pseudomonadales   |
| JX990210 | CSM1280-2-head-r  | Bacteria | Proteobacteria | Epsilonproteobacteria | Campylobacterales |
| JX990211 | CSM1280-2-head-rr | Bacteria | Proteobacteria | Alphaproteobacteria   | Rhizobiales       |
| JX990212 | CSM1280-2-head-s  | Bacteria | Proteobacteria | Gammaproteobacteria   | Xanthomonadales   |
| JX990213 | CSM1280-2-head-ss | Bacteria | Proteobacteria | Gammaproteobacteria   | Xanthomonadales   |
| JX990214 | CSM1280-2-head-u  | Bacteria | Proteobacteria | Gammaproteobacteria   | Xanthomonadales   |

|          |                   |          |                 |                       |                    |
|----------|-------------------|----------|-----------------|-----------------------|--------------------|
| JX990215 | CSM1280-2-head-v  | Bacteria | Proteobacteria  | Betaproteobacteria    | Burkholderiales    |
| JX990216 | CSM1280-2-head-x  | Bacteria | Proteobacteria  | Betaproteobacteria    | Burkholderiales    |
| JX990217 | CSM1280-2-head-y  | Bacteria | Proteobacteria  | Alphaproteobacteria   | Rhizobiales        |
| JX990218 | CSM1280-2-head-z  | Bacteria | Proteobacteria  | Epsilonproteobacteria | Campylobacterales  |
| JQ254745 | CSM1280-2-hind-aa | Bacteria | Bacteroidetes   | Sphingobacteria       | Sphingobacteriales |
| JQ254746 | CSM1280-2-hind-b  | Bacteria | Proteobacteria  | Gammaproteobacteria   | Xanthomonadales    |
| JQ254747 | CSM1280-2-hind-bb | Bacteria | Proteobacteria  | Gammaproteobacteria   |                    |
| JQ254748 | CSM1280-2-hind-cc | Bacteria | Bacteroidetes   | Sphingobacteria       | Sphingobacteriales |
| JQ254749 | CSM1280-2-hind-dd | Bacteria | Proteobacteria  | Betaproteobacteria    | Burkholderiales    |
| JQ254750 | CSM1280-2-hind-ee | Bacteria | Proteobacteria  | Epsilonproteobacteria | Campylobacterales  |
| JQ254751 | CSM1280-2-hind-ff | Bacteria | Proteobacteria  | Betaproteobacteria    | Burkholderiales    |
| JQ254752 | CSM1280-2-hind-g  | Bacteria | Verrucomicrobia | Opitutae              | Opitales           |
| JQ254753 | CSM1280-2-hind-gg | Bacteria | Proteobacteria  | Alphaproteobacteria   | Rhizobiales        |
| JQ254754 | CSM1280-2-hind-h  | Bacteria | Proteobacteria  | Betaproteobacteria    | Burkholderiales    |
| JQ254755 | CSM1280-2-hind-hh | Bacteria | Proteobacteria  | Gammaproteobacteria   | Xanthomonadales    |
| JX990219 | CSM1280-2-hind-ii | Bacteria | Proteobacteria  | Betaproteobacteria    | Burkholderiales    |
| JQ254756 | CSM1280-2-hind-jj | Bacteria | Proteobacteria  | Betaproteobacteria    | Burkholderiales    |
| JQ254757 | CSM1280-2-hind-k  | Bacteria | Proteobacteria  | Betaproteobacteria    | Burkholderiales    |
| JQ254758 | CSM1280-2-hind-kk | Bacteria | Proteobacteria  | Gammaproteobacteria   | Xanthomonadales    |
| JQ254759 | CSM1280-2-hind-l  | Bacteria | Proteobacteria  | Gammaproteobacteria   | Xanthomonadales    |
| JQ254760 | CSM1280-2-hind-ll | Bacteria | Proteobacteria  | Betaproteobacteria    | Burkholderiales    |
| JQ254761 | CSM1280-2-hind-mm | Bacteria | Bacteroidetes   | Sphingobacteria       | Sphingobacteriales |
| JQ254762 | CSM1280-2-hind-oo | Bacteria | Proteobacteria  | Alphaproteobacteria   | Rhizobiales        |
| JQ254763 | CSM1280-2-hind-pp | Bacteria | Proteobacteria  | Gammaproteobacteria   | Xanthomonadales    |
| JQ254764 | CSM1280-2-hind-q  | Bacteria | Proteobacteria  | Betaproteobacteria    | Burkholderiales    |
| JQ254765 | CSM1280-2-hind-r  | Bacteria | Verrucomicrobia | Opitutae              | Opitales           |
| JQ254766 | CSM1280-2-hind-s  | Bacteria | Proteobacteria  | Betaproteobacteria    | Burkholderiales    |
| JX990220 | CSM1280-2-hind-t  | Bacteria | Proteobacteria  | Betaproteobacteria    | Burkholderiales    |
| JQ254767 | CSM1280-2-hind-u  | Bacteria | Proteobacteria  | Gammaproteobacteria   |                    |
| JQ254768 | CSM1280-2-hind-v  | Bacteria | Proteobacteria  | Gammaproteobacteria   | Xanthomonadales    |
| JQ254769 | CSM1280-2-hind-w  | Bacteria | Proteobacteria  | Gammaproteobacteria   | Xanthomonadales    |
| JQ254770 | CSM1280-2-hind-x  | Bacteria | Proteobacteria  | Gammaproteobacteria   | Xanthomonadales    |
| JX990221 | CSM1280-2-hind-y  | Bacteria | Proteobacteria  | Betaproteobacteria    | Burkholderiales    |
| JQ254771 | CSM1280-2-mid-aa  | Bacteria | Proteobacteria  | Epsilonproteobacteria | Campylobacterales  |

|          |                    |          |                 |                       |                   |
|----------|--------------------|----------|-----------------|-----------------------|-------------------|
| JQ254772 | CSM1280-2-mid-aaa  | Bacteria | Proteobacteria  | Epsilonproteobacteria | Campylobacterales |
| JQ254773 | CSM1280-2-mid-aaaa | Bacteria | Proteobacteria  | Epsilonproteobacteria | Campylobacterales |
| JQ254774 | CSM1280-2-mid-bb   | Bacteria | Proteobacteria  | Epsilonproteobacteria | Campylobacterales |
| JQ254775 | CSM1280-2-mid-bbb  | Bacteria | Verrucomicrobia | Opitutae              | Opitutales        |
| JQ254776 | CSM1280-2-mid-c    | Bacteria | Proteobacteria  | Epsilonproteobacteria | Campylobacterales |
| JQ254777 | CSM1280-2-mid-cc   | Bacteria | Proteobacteria  | Epsilonproteobacteria | Campylobacterales |
| JQ254778 | CSM1280-2-mid-ccc  | Bacteria | Proteobacteria  | Gammaproteobacteria   | Xanthomonadales   |
| JQ254779 | CSM1280-2-mid-dd   | Bacteria | Proteobacteria  | Epsilonproteobacteria | Campylobacterales |
| JQ254780 | CSM1280-2-mid-ddd  | Bacteria | Proteobacteria  | Epsilonproteobacteria | Campylobacterales |
| JQ254781 | CSM1280-2-mid-ee   | Bacteria | Verrucomicrobia | Opitutae              | Opitutales        |
| JQ254782 | CSM1280-2-mid-eee  | Bacteria | Proteobacteria  | Betaproteobacteria    | Burkholderiales   |
| JQ254783 | CSM1280-2-mid-ff   | Bacteria | Proteobacteria  | Epsilonproteobacteria | Campylobacterales |
| JQ254784 | CSM1280-2-mid-fff  | Bacteria | Proteobacteria  | Epsilonproteobacteria | Campylobacterales |
| JQ254785 | CSM1280-2-mid-gg   | Bacteria | Proteobacteria  | Epsilonproteobacteria | Campylobacterales |
| JQ254786 | CSM1280-2-mid-ggg  | Bacteria | Verrucomicrobia | Opitutae              | Opitutales        |
| JQ254787 | CSM1280-2-mid-hh   | Bacteria | Proteobacteria  | Epsilonproteobacteria | Campylobacterales |
| JQ254788 | CSM1280-2-mid-hhh  | Bacteria | Proteobacteria  | Epsilonproteobacteria | Campylobacterales |
| JQ254789 | CSM1280-2-mid-ii   | Bacteria | Proteobacteria  | Epsilonproteobacteria | Campylobacterales |
| JQ254790 | CSM1280-2-mid-iii  | Bacteria | Proteobacteria  | Epsilonproteobacteria | Campylobacterales |
| JQ254791 | CSM1280-2-mid-jj   | Bacteria | Verrucomicrobia | Opitutae              | Opitutales        |
| JQ254792 | CSM1280-2-mid-jjj  | Bacteria | Proteobacteria  | Epsilonproteobacteria | Campylobacterales |
| JQ254793 | CSM1280-2-mid-kk   | Bacteria | Proteobacteria  | Epsilonproteobacteria | Campylobacterales |
| JQ254794 | CSM1280-2-mid-kkk  | Bacteria | Proteobacteria  | Epsilonproteobacteria | Campylobacterales |
| JX990222 | CSM1280-2-mid-ll   | Bacteria | Verrucomicrobia | Opitutae              | Opitutales        |
| JQ254795 | CSM1280-2-mid-lll  | Bacteria | Proteobacteria  | Epsilonproteobacteria | Campylobacterales |
| JQ254796 | CSM1280-2-mid-mm   | Bacteria | Proteobacteria  | Epsilonproteobacteria | Campylobacterales |
| JQ254797 | CSM1280-2-mid-mmm  | Bacteria | Proteobacteria  | Epsilonproteobacteria | Campylobacterales |
| JQ254798 | CSM1280-2-mid-nn   | Bacteria | Verrucomicrobia | Opitutae              | Opitutales        |
| JQ254799 | CSM1280-2-mid-nnn  | Bacteria | Proteobacteria  | Epsilonproteobacteria | Campylobacterales |
| JQ254800 | CSM1280-2-mid-oo   | Bacteria | Proteobacteria  | Epsilonproteobacteria | Campylobacterales |
| JQ254801 | CSM1280-2-mid-ooo  | Bacteria | Proteobacteria  | Epsilonproteobacteria | Campylobacterales |
| JQ254802 | CSM1280-2-mid-p    | Bacteria | Proteobacteria  | Epsilonproteobacteria | Campylobacterales |
| JQ254803 | CSM1280-2-mid-pp   | Bacteria | Proteobacteria  | Epsilonproteobacteria | Campylobacterales |
| JQ254804 | CSM1280-2-mid-ppp  | Bacteria | Proteobacteria  | Epsilonproteobacteria | Campylobacterales |



|          |                   |          |                 |                       |                   |
|----------|-------------------|----------|-----------------|-----------------------|-------------------|
| JQ254805 | CSM1280-2-mid-q   | Bacteria | Proteobacteria  | Epsilonproteobacteria | Campylobacterales |
| JQ254806 | CSM1280-2-mid-qq  | Bacteria | Proteobacteria  | Epsilonproteobacteria | Campylobacterales |
| JQ254807 | CSM1280-2-mid-qqq | Bacteria | Proteobacteria  | Epsilonproteobacteria | Campylobacterales |
| JQ254808 | CSM1280-2-mid-r   | Bacteria | Proteobacteria  | Epsilonproteobacteria | Campylobacterales |
| JQ254809 | CSM1280-2-mid-rr  | Bacteria | Proteobacteria  | Epsilonproteobacteria | Campylobacterales |
| JQ254810 | CSM1280-2-mid-rrr | Bacteria | Proteobacteria  | Epsilonproteobacteria | Campylobacterales |
| JQ254811 | CSM1280-2-mid-s   | Bacteria | Proteobacteria  | Epsilonproteobacteria | Campylobacterales |
| JQ254812 | CSM1280-2-mid-ss  | Bacteria | Proteobacteria  | Epsilonproteobacteria | Campylobacterales |
| JQ254813 | CSM1280-2-mid-sss | Bacteria | Verrucomicrobia | Opitutae              | Opitales          |
| JQ254814 | CSM1280-2-mid-t   | Bacteria | Proteobacteria  | Epsilonproteobacteria | Campylobacterales |
| JQ254815 | CSM1280-2-mid-tt  | Bacteria | Proteobacteria  | Epsilonproteobacteria | Campylobacterales |
| JQ254816 | CSM1280-2-mid-ttt | Bacteria | Proteobacteria  | Epsilonproteobacteria | Campylobacterales |
| JQ254817 | CSM1280-2-mid-u   | Bacteria | Proteobacteria  | Epsilonproteobacteria | Campylobacterales |
| JQ254818 | CSM1280-2-mid-uu  | Bacteria | Proteobacteria  | Epsilonproteobacteria | Campylobacterales |
| JQ254819 | CSM1280-2-mid-uuu | Bacteria | Proteobacteria  | Epsilonproteobacteria | Campylobacterales |
| JQ254820 | CSM1280-2-mid-vv  | Bacteria | Proteobacteria  | Epsilonproteobacteria | Campylobacterales |
| JQ254821 | CSM1280-2-mid-vvv | Bacteria | Proteobacteria  | Epsilonproteobacteria | Campylobacterales |
| JQ254822 | CSM1280-2-mid-w   | Bacteria | Proteobacteria  | Epsilonproteobacteria | Campylobacterales |
| JQ254823 | CSM1280-2-mid-ww  | Bacteria | Proteobacteria  | Epsilonproteobacteria | Campylobacterales |
| JQ254824 | CSM1280-2-mid-www | Bacteria | Proteobacteria  | Epsilonproteobacteria | Campylobacterales |
| JQ254825 | CSM1280-2-mid-x   | Bacteria | Proteobacteria  | Epsilonproteobacteria | Campylobacterales |
| JQ254826 | CSM1280-2-mid-xx  | Bacteria | Proteobacteria  | Epsilonproteobacteria | Campylobacterales |
| JQ254827 | CSM1280-2-mid-xxx | Bacteria | Proteobacteria  | Epsilonproteobacteria | Campylobacterales |
| JQ254828 | CSM1280-2-mid-y   | Bacteria | Proteobacteria  | Epsilonproteobacteria | Campylobacterales |
| JQ254829 | CSM1280-2-mid-yy  | Bacteria | Proteobacteria  | Epsilonproteobacteria | Campylobacterales |
| JQ254830 | CSM1280-2-mid-yyy | Bacteria | Proteobacteria  | Epsilonproteobacteria | Campylobacterales |
| JQ254831 | CSM1280-2-mid-z   | Bacteria | Proteobacteria  | Epsilonproteobacteria | Campylobacterales |
| JQ254832 | CSM1280-2-mid-zz  | Bacteria | Proteobacteria  | Epsilonproteobacteria | Campylobacterales |
| JQ254833 | CSM1280-2-mid-zzz | Bacteria | Verrucomicrobia | Opitutae              | Opitales          |
| JX990223 | CSM1280-3-crop-aa | Bacteria | Proteobacteria  | Gammaproteobacteria   | Xanthomonadales   |
| JX990224 | CSM1280-3-crop-c  | Bacteria | Proteobacteria  | Gammaproteobacteria   | Oceanospirillales |
| JX990225 | CSM1280-3-crop-f  | Bacteria | Proteobacteria  | Gammaproteobacteria   | Xanthomonadales   |
| JX990226 | CSM1280-3-crop-g  | Bacteria | Proteobacteria  | Betaproteobacteria    | Burkholderiales   |
| JX990227 | CSM1280-3-crop-h  | Bacteria | Verrucomicrobia | Opitutae              | Opitales          |

|          |                   |          |                 |                     |                  |
|----------|-------------------|----------|-----------------|---------------------|------------------|
| JX990228 | CSM1280-3-crop-i  | Bacteria | Proteobacteria  | Gammaproteobacteria | Xanthomonadales  |
| JX990229 | CSM1280-3-crop-j  | Bacteria | Proteobacteria  | Gammaproteobacteria | Xanthomonadales  |
| JX990230 | CSM1280-3-crop-k  | Bacteria | Bacteroidetes   | Flavobacteria       | Flavobacteriales |
| JX990231 | CSM1280-3-crop-l  | Bacteria | Proteobacteria  | Betaproteobacteria  | Burkholderiales  |
| JX990232 | CSM1280-3-crop-n  | Bacteria | Proteobacteria  | Gammaproteobacteria | Xanthomonadales  |
| JX990233 | CSM1280-3-crop-o  | Bacteria | Proteobacteria  | Alphaproteobacteria | Rhizobiales      |
| JX990234 | CSM1280-3-crop-q  | Bacteria | Proteobacteria  | Betaproteobacteria  | Burkholderiales  |
| JX990235 | CSM1280-3-crop-r  | Bacteria | Proteobacteria  | Betaproteobacteria  | Burkholderiales  |
| JX990236 | CSM1280-3-crop-s  | Bacteria | Proteobacteria  | Gammaproteobacteria | Xanthomonadales  |
| JX990237 | CSM1280-3-crop-t  | Bacteria | Proteobacteria  | Betaproteobacteria  | Burkholderiales  |
| JX990238 | CSM1280-3-crop-u  | Bacteria | Verrucomicrobia | Opitutae            | Opitales         |
| JX990239 | CSM1280-3-crop-v  | Bacteria | Proteobacteria  | Gammaproteobacteria | Xanthomonadales  |
| JX990240 | CSM1280-3-crop-w  | Bacteria | Proteobacteria  | Alphaproteobacteria | Rhizobiales      |
| JX990241 | CSM1280-3-crop-x  | Bacteria | Proteobacteria  | Alphaproteobacteria | Rhizobiales      |
| JX990242 | CSM1280-3-crop-y  | Bacteria | Proteobacteria  | Betaproteobacteria  | Burkholderiales  |
| JX990243 | CSM1280-3-crop-z  | Bacteria | Proteobacteria  | Gammaproteobacteria | Pseudomonadales  |
| JX990244 | CSM1280-3-head-aa | Bacteria | Firmicutes      | Bacilli             | Lactobacillales  |
| JX990245 | CSM1280-3-head-bb | Bacteria | Proteobacteria  | Alphaproteobacteria | Rhizobiales      |
| JX990246 | CSM1280-3-head-c  | Bacteria | Proteobacteria  | Gammaproteobacteria | Xanthomonadales  |
| JX990247 | CSM1280-3-head-cc | Bacteria | Proteobacteria  | Alphaproteobacteria | Rhizobiales      |
| JX990248 | CSM1280-3-head-d  | Bacteria | Proteobacteria  | Alphaproteobacteria | Rhizobiales      |
| JX990249 | CSM1280-3-head-dd | Bacteria | Firmicutes      | Bacilli             | Lactobacillales  |
| JX990250 | CSM1280-3-head-e  | Bacteria | Firmicutes      | Bacilli             | Lactobacillales  |
| JX990251 | CSM1280-3-head-ee | Bacteria | Firmicutes      | Bacilli             | Lactobacillales  |
| JX990252 | CSM1280-3-head-ff | Bacteria | Proteobacteria  | Betaproteobacteria  | Burkholderiales  |
| JX990253 | CSM1280-3-head-g  | Bacteria | Proteobacteria  | Gammaproteobacteria | Xanthomonadales  |
| JX990254 | CSM1280-3-head-gg | Bacteria | Proteobacteria  | Alphaproteobacteria | Sphingomonadales |
| JX990255 | CSM1280-3-head-hh | Bacteria | Proteobacteria  | Alphaproteobacteria | Rhizobiales      |
| JX990256 | CSM1280-3-head-i  | Bacteria | Proteobacteria  | Gammaproteobacteria | Xanthomonadales  |
| JX990257 | CSM1280-3-head-jj | Bacteria | Actinobacteria  | Actinobacteria      | Actinobacteridae |
| JX990258 | CSM1280-3-head-k  | Bacteria | Proteobacteria  | Alphaproteobacteria | Rhizobiales      |
| JX990259 | CSM1280-3-head-kk | Bacteria | Firmicutes      | Bacilli             | Lactobacillales  |
| JX990260 | CSM1280-3-head-l  | Bacteria | Proteobacteria  | Betaproteobacteria  | Burkholderiales  |
| JX990261 | CSM1280-3-head-ll | Bacteria | Proteobacteria  | Gammaproteobacteria | Xanthomonadales  |

|          |                    |          |                 |                     |                 |
|----------|--------------------|----------|-----------------|---------------------|-----------------|
| JX990262 | CSM1280-3-head-m   | Bacteria | Proteobacteria  | Betaproteobacteria  | Burkholderiales |
| JX990263 | CSM1280-3-head-mm  | Bacteria | Proteobacteria  | Betaproteobacteria  | Burkholderiales |
| JX990264 | CSM1280-3-head-nn  | Bacteria | Proteobacteria  | Alphaproteobacteria | Rhizobiales     |
| JX990265 | CSM1280-3-head-oo  | Bacteria | Proteobacteria  | Betaproteobacteria  | Burkholderiales |
| JX990266 | CSM1280-3-head-q   | Bacteria | Firmicutes      | Bacilli             | Lactobacillales |
| JX990267 | CSM1280-3-head-r   | Bacteria | Proteobacteria  | Betaproteobacteria  | Burkholderiales |
| JX990268 | CSM1280-3-head-s   | Bacteria | Proteobacteria  | Alphaproteobacteria | Rhizobiales     |
| JX990269 | CSM1280-3-head-t   | Bacteria | Proteobacteria  | Alphaproteobacteria | Rhizobiales     |
| JX990270 | CSM1280-3-head-u   | Bacteria | Proteobacteria  | Gammaproteobacteria | Xanthomonadales |
| JX990271 | CSM1280-3-head-v   | Bacteria | Firmicutes      | Bacilli             | Lactobacillales |
| JX990272 | CSM1280-3-head-w   | Bacteria | Proteobacteria  | Alphaproteobacteria | Rhizobiales     |
| JX990273 | CSM1280-3-head-x   | Bacteria | Firmicutes      | Bacilli             | Lactobacillales |
| JX990274 | CSM1280-3-head-y   | Bacteria | Proteobacteria  | Gammaproteobacteria | Xanthomonadales |
| JX990275 | CSM1280-3-head-z   | Bacteria | Proteobacteria  | Betaproteobacteria  | Burkholderiales |
| JQ254834 | CSM1280-3-hind-a   | Bacteria | Proteobacteria  | Gammaproteobacteria |                 |
| JQ254835 | CSM1280-3-hind-aa  | Bacteria | Verrucomicrobia | Opitutae            | Opitutales      |
| JQ254836 | CSM1280-3-hind-b   | Bacteria | Proteobacteria  | Betaproteobacteria  | Burkholderiales |
| JQ254837 | CSM1280-3-hind-bb  | Bacteria | Verrucomicrobia | Opitutae            | Opitutales      |
| JX990276 | CSM1280-3-hind-c   | Bacteria | Proteobacteria  | Betaproteobacteria  | Burkholderiales |
| JQ254838 | CSM1280-3-hind-cc  | Bacteria | Proteobacteria  | Betaproteobacteria  | Burkholderiales |
| JQ254839 | CSM1280-3-hind-d   | Bacteria | Proteobacteria  | Alphaproteobacteria | Rhizobiales     |
| JQ254840 | CSM1280-3-hind-dd  | Bacteria | Verrucomicrobia | Opitutae            | Opitutales      |
| JQ254841 | CSM1280-3-hind-e   | Bacteria | Proteobacteria  | Betaproteobacteria  | Burkholderiales |
| JQ254842 | CSM1280-3-hind-ee  | Bacteria | Proteobacteria  | Gammaproteobacteria |                 |
| JQ254843 | CSM1280-3-hind-f   | Bacteria | Firmicutes      | Bacilli             | Lactobacillales |
| JQ254844 | CSM1280-3-hind-ff  | Bacteria | Verrucomicrobia | Opitutae            | Opitutales      |
| JQ254845 | CSM1280-3-hind-g   | Bacteria | Proteobacteria  | Betaproteobacteria  | Burkholderiales |
| JQ254846 | CSM1280-3-hind-gg  | Bacteria | Proteobacteria  | Gammaproteobacteria | Xanthomonadales |
| JQ254847 | CSM1280-3-hind-h   | Bacteria | Proteobacteria  | Gammaproteobacteria |                 |
| JQ254848 | CSM1280-3-hind-hh  | Bacteria | Proteobacteria  | Betaproteobacteria  | Burkholderiales |
| JX990277 | CSM1280-3-hind-ii  | Bacteria | Proteobacteria  | Alphaproteobacteria | Rhizobiales     |
| JQ254849 | CSM1280-3-hind-jjj | Bacteria | Verrucomicrobia | Opitutae            | Opitutales      |
| JQ254850 | CSM1280-3-hind-k   | Bacteria | Proteobacteria  | Betaproteobacteria  | Burkholderiales |
| JQ254851 | CSM1280-3-hind-l   | Bacteria | Proteobacteria  | Betaproteobacteria  | Burkholderiales |

|          |                   |          |                 |                       |                    |
|----------|-------------------|----------|-----------------|-----------------------|--------------------|
| JX990278 | CSM1280-3-hind-l2 | Bacteria | Proteobacteria  | Betaproteobacteria    | Burkholderiales    |
| JQ254852 | CSM1280-3-hind-ll | Bacteria | Proteobacteria  | Betaproteobacteria    | Burkholderiales    |
| JQ254853 | CSM1280-3-hind-mm | Bacteria | Proteobacteria  | Betaproteobacteria    | Burkholderiales    |
| JQ254854 | CSM1280-3-hind-n  | Bacteria | Proteobacteria  | Betaproteobacteria    | Burkholderiales    |
| JQ254855 | CSM1280-3-hind-nn | Bacteria | Proteobacteria  | Betaproteobacteria    | Burkholderiales    |
| JQ254856 | CSM1280-3-hind-p  | Bacteria | Proteobacteria  | Epsilonproteobacteria | Campylobacterales  |
| JQ254857 | CSM1280-3-hind-q  | Bacteria | Proteobacteria  | Betaproteobacteria    | Burkholderiales    |
| JQ254858 | CSM1280-3-hind-r  | Bacteria | Proteobacteria  | Betaproteobacteria    | Burkholderiales    |
| JQ254859 | CSM1280-3-hind-s  | Bacteria | Proteobacteria  | Betaproteobacteria    | Burkholderiales    |
| JQ254860 | CSM1280-3-hind-u  | Bacteria | Proteobacteria  | Betaproteobacteria    | Burkholderiales    |
| JQ254861 | CSM1280-3-hind-v  | Bacteria | Verrucomicrobia | Opitutae              | Opitutales         |
| JQ254862 | CSM1280-3-hind-w  | Bacteria | Proteobacteria  | Gammaproteobacteria   |                    |
| JQ254863 | CSM1280-3-hind-x  | Bacteria | Bacteroidetes   | Sphingobacteria       | Sphingobacteriales |
| JQ254864 | CSM1280-3-hind-y  | Bacteria | Proteobacteria  | Betaproteobacteria    | Burkholderiales    |
| JQ254865 | CSM1280-3-hind-z  | Bacteria | Proteobacteria  | Betaproteobacteria    | Burkholderiales    |
| JX990279 | CSM1280-3-mid-aa  | Bacteria | Proteobacteria  | Betaproteobacteria    | Burkholderiales    |
| JQ254866 | CSM1280-3-mid-c   | Bacteria | Proteobacteria  | Epsilonproteobacteria | Campylobacterales  |
| JQ254867 | CSM1280-3-mid-ee  | Bacteria | Verrucomicrobia | Opitutae              | Opitutales         |
| JQ254868 | CSM1280-3-mid-h   | Bacteria | Proteobacteria  | Betaproteobacteria    | Burkholderiales    |
| JQ254869 | CSM1280-3-mid-hh  | Bacteria | Proteobacteria  | Betaproteobacteria    | Burkholderiales    |
| JQ254870 | CSM1280-3-mid-jj  | Bacteria | Proteobacteria  | Betaproteobacteria    | Burkholderiales    |
| JX990280 | CSM1280-3-mid-m   | Bacteria | Proteobacteria  | Betaproteobacteria    | Burkholderiales    |
| JQ254871 | CSM1280-3-mid-o   | Bacteria | Proteobacteria  | Gammaproteobacteria   | Xanthomonadales    |
| JQ254872 | CSM1280-3-mid-p   | Bacteria | Proteobacteria  | Gammaproteobacteria   | Xanthomonadales    |
| JQ254873 | CSM1280-3-mid-r   | Bacteria | Proteobacteria  | Betaproteobacteria    | Burkholderiales    |
| JQ254874 | CSM1280-3-mid-rr  | Bacteria | Verrucomicrobia | Opitutae              | Opitutales         |
| JQ254875 | CSM1280-3-mid-ss  | Bacteria | Proteobacteria  | Gammaproteobacteria   | Xanthomonadales    |
| JQ254876 | CSM1280-3-mid-tt  | Bacteria | Proteobacteria  | Epsilonproteobacteria | Campylobacterales  |
| JQ254877 | CSM1280-3-mid-uu  | Bacteria | Proteobacteria  | Betaproteobacteria    | Burkholderiales    |
| JQ254878 | CSM1280-3-mid-vv  | Bacteria | Proteobacteria  | Gammaproteobacteria   | Xanthomonadales    |
| JQ254879 | CSM1280-3-mid-w   | Bacteria | Proteobacteria  | Betaproteobacteria    | Burkholderiales    |
| JQ254880 | CSM1280-3-mid-x   | Bacteria | Verrucomicrobia | Opitutae              | Opitutales         |
| JQ254882 | CSM1280-3-mid-z   | Bacteria | Proteobacteria  | Betaproteobacteria    | Burkholderiales    |
| JQ254290 | CSM1323-gut-3-1   | Bacteria | Tenericutes     | Mollicutes            | Entomoplasmatales  |

|          |                   |          |                |                    |                   |
|----------|-------------------|----------|----------------|--------------------|-------------------|
| JQ254291 | CSM1323-gut-3-2   | Bacteria | Tenericutes    | Mollicutes         | Entomoplasmatales |
| JX990281 | CSM1323-gut-3-3   | Bacteria | Proteobacteria | Betaproteobacteria | Burkholderiales   |
| JQ254292 | CSM1323-gut-3-ah  | Bacteria | Tenericutes    | Mollicutes         | Entomoplasmatales |
| JQ254293 | CSM1323-gut-3-aj  | Bacteria | Tenericutes    | Mollicutes         | Entomoplasmatales |
| JQ254294 | CSM1323-gut-3-ak  | Bacteria | Tenericutes    | Mollicutes         | Entomoplasmatales |
| JQ254295 | CSM1323-gut-3-al  | Bacteria | Tenericutes    | Mollicutes         | Entomoplasmatales |
| JQ254296 | CSM1323-gut-3-an  | Bacteria | Tenericutes    | Mollicutes         | Entomoplasmatales |
| JQ254297 | CSM1323-gut-3-ap  | Bacteria | Tenericutes    | Mollicutes         | Entomoplasmatales |
| JQ254298 | CSM1323-gut-3-ar  | Bacteria | Tenericutes    | Mollicutes         | Entomoplasmatales |
| JQ254299 | CSM1323-gut-3-as  | Bacteria | Tenericutes    | Mollicutes         | Entomoplasmatales |
| JQ254300 | CSM1323-gut-3-aw  | Bacteria | Tenericutes    | Mollicutes         | Entomoplasmatales |
| JQ254301 | CSM1323-gut-3-c   | Bacteria | Tenericutes    | Mollicutes         | Entomoplasmatales |
| JQ254302 | CSM1323-gut-3-d   | Bacteria | Tenericutes    | Mollicutes         | Entomoplasmatales |
| JQ254303 | CSM1323-gut-3-e   | Bacteria | Proteobacteria | Betaproteobacteria | Burkholderiales   |
| JQ254304 | CSM1323-gut-3-f   | Bacteria | Tenericutes    | Mollicutes         | Entomoplasmatales |
| JQ254305 | CSM1323-gut-3-i   | Bacteria | Tenericutes    | Mollicutes         | Entomoplasmatales |
| JQ254306 | CSM1323-gut-3-j   | Bacteria | Bacteroidetes  | Flavobacteria      | Flavobacteriales  |
| JQ254307 | CSM1323-gut-3-k   | Bacteria | Bacteroidetes  | Flavobacteria      | Flavobacteriales  |
| JQ254308 | CSM1323-gut-3-m   | Bacteria | Tenericutes    | Mollicutes         | Entomoplasmatales |
| JQ254309 | CSM1323-gut-3-q   | Bacteria | Tenericutes    | Mollicutes         | Entomoplasmatales |
| JQ254310 | CSM1323-gut-3-t   | Bacteria | Tenericutes    | Mollicutes         | Entomoplasmatales |
| JQ254311 | CSM1323-gut-3-x   | Bacteria | Bacteroidetes  | Flavobacteria      | Flavobacteriales  |
| JX990282 | CSM1323-head-3-a  | Bacteria | Tenericutes    | Mollicutes         | Entomoplasmatales |
| JX990283 | CSM1323-head-3-aa | Bacteria | Tenericutes    | Mollicutes         | Entomoplasmatales |
| JX990284 | CSM1323-head-3-b  | Bacteria | Tenericutes    | Mollicutes         | Entomoplasmatales |
| JX990285 | CSM1323-head-3-c  | Bacteria | Tenericutes    | Mollicutes         | Entomoplasmatales |
| JX990286 | CSM1323-head-3-cc | Bacteria | Tenericutes    | Mollicutes         | Entomoplasmatales |
| JX990287 | CSM1323-head-3-dd | Bacteria | Tenericutes    | Mollicutes         | Entomoplasmatales |
| JX990288 | CSM1323-head-3-e  | Bacteria | Tenericutes    | Mollicutes         | Entomoplasmatales |
| JX990289 | CSM1323-head-3-ee | Bacteria | Tenericutes    | Mollicutes         | Entomoplasmatales |
| JX990290 | CSM1323-head-3-f  | Bacteria | Tenericutes    | Mollicutes         | Entomoplasmatales |
| JX990291 | CSM1323-head-3-g  | Bacteria | Tenericutes    | Mollicutes         | Entomoplasmatales |
| JX990292 | CSM1323-head-3-gg | Bacteria | Tenericutes    | Mollicutes         | Entomoplasmatales |
| JX990293 | CSM1323-head-3-h  | Bacteria | Tenericutes    | Mollicutes         | Entomoplasmatales |

|          |                   |          |             |            |                   |
|----------|-------------------|----------|-------------|------------|-------------------|
| JX990294 | CSM1323-head-3-hh | Bacteria | Tenericutes | Mollicutes | Entomoplasmatales |
| JX990295 | CSM1323-head-3-i  | Bacteria | Tenericutes | Mollicutes | Entomoplasmatales |
| JX990296 | CSM1323-head-3-ii | Bacteria | Tenericutes | Mollicutes | Entomoplasmatales |
| JX990297 | CSM1323-head-3-j  | Bacteria | Tenericutes | Mollicutes | Entomoplasmatales |
| JX990298 | CSM1323-head-3-jj | Bacteria | Tenericutes | Mollicutes | Entomoplasmatales |
| JX990299 | CSM1323-head-3-k  | Bacteria | Tenericutes | Mollicutes | Entomoplasmatales |
| JX990300 | CSM1323-head-3-kk | Bacteria | Tenericutes | Mollicutes | Entomoplasmatales |
| JX990301 | CSM1323-head-3-l  | Bacteria | Tenericutes | Mollicutes | Entomoplasmatales |
| JX990302 | CSM1323-head-3-ll | Bacteria | Tenericutes | Mollicutes | Entomoplasmatales |
| JX990303 | CSM1323-head-3-m  | Bacteria | Tenericutes | Mollicutes | Entomoplasmatales |
| JX990304 | CSM1323-head-3-mm | Bacteria | Tenericutes | Mollicutes | Entomoplasmatales |
| JX990305 | CSM1323-head-3-n  | Bacteria | Tenericutes | Mollicutes | Entomoplasmatales |
| JX990306 | CSM1323-head-3-nn | Bacteria | Tenericutes | Mollicutes | Entomoplasmatales |
| JX990307 | CSM1323-head-3-oo | Bacteria | Firmicutes  | Bacilli    | Lactobacillales   |
| JX990308 | CSM1323-head-3-p  | Bacteria | Tenericutes | Mollicutes | Entomoplasmatales |
| JX990309 | CSM1323-head-3-q  | Bacteria | Tenericutes | Mollicutes | Entomoplasmatales |
| JX990310 | CSM1323-head-3-r  | Bacteria | Tenericutes | Mollicutes | Entomoplasmatales |
| JX990311 | CSM1323-head-3-s  | Bacteria | Tenericutes | Mollicutes | Entomoplasmatales |
| JX990312 | CSM1323-head-3-t  | Bacteria | Tenericutes | Mollicutes | Entomoplasmatales |
| JX990313 | CSM1323-head-3-u  | Bacteria | Tenericutes | Mollicutes | Entomoplasmatales |
| JX990314 | CSM1323-head-3-v  | Bacteria | Tenericutes | Mollicutes | Entomoplasmatales |
| JX990315 | CSM1323-head-3-x  | Bacteria | Tenericutes | Mollicutes | Entomoplasmatales |
| JX990316 | CSM1323-head-3-y  | Bacteria | Tenericutes | Mollicutes | Entomoplasmatales |
| JX990317 | CSM1323-head-3-z  | Bacteria | Tenericutes | Mollicutes | Entomoplasmatales |
| JX990318 | CSM1323-leg-3-aa  | Bacteria | Tenericutes | Mollicutes | Entomoplasmatales |
| JX990319 | CSM1323-leg-3-b   | Bacteria | Tenericutes | Mollicutes | Entomoplasmatales |
| JX990320 | CSM1323-leg-3-bb  | Bacteria | Tenericutes | Mollicutes | Entomoplasmatales |
| JX990321 | CSM1323-leg-3-c   | Bacteria | Tenericutes | Mollicutes | Entomoplasmatales |
| JX990322 | CSM1323-leg-3-d   | Bacteria | Tenericutes | Mollicutes | Entomoplasmatales |
| JX990323 | CSM1323-leg-3-e   | Bacteria | Tenericutes | Mollicutes | Entomoplasmatales |
| JX990324 | CSM1323-leg-3-f   | Bacteria | Tenericutes | Mollicutes | Entomoplasmatales |
| JX990325 | CSM1323-leg-3-ff  | Bacteria | Tenericutes | Mollicutes | Entomoplasmatales |
| JX990326 | CSM1323-leg-3-h   | Bacteria | Tenericutes | Mollicutes | Entomoplasmatales |
| JX990327 | CSM1323-leg-3-hh  | Bacteria | Tenericutes | Mollicutes | Entomoplasmatales |

|          |                 |          |             |            |                   |
|----------|-----------------|----------|-------------|------------|-------------------|
| JX990328 | CSM1323-leg-3-k | Bacteria | Tenericutes | Mollicutes | Entomoplasmatales |
| JX990329 | CSM1323-leg-3-m | Bacteria | Tenericutes | Mollicutes | Entomoplasmatales |
| JX990330 | CSM1323-leg-3-r | Bacteria | Tenericutes | Mollicutes | Entomoplasmatales |
| JX990331 | CSM1323-leg-3-v | Bacteria | Tenericutes | Mollicutes | Entomoplasmatales |
| JX990332 | CSM1323-leg-3-w | Bacteria | Tenericutes | Mollicutes | Entomoplasmatales |
| JX990333 | CSM1323-leg-3-x | Bacteria | Tenericutes | Mollicutes | Entomoplasmatales |
| JX990334 | CSM1323-leg-3-y | Bacteria | Tenericutes | Mollicutes | Entomoplasmatales |

|          |          |          |                |                     |                   |
|----------|----------|----------|----------------|---------------------|-------------------|
| JX990131 | Cul_0100 | Bacteria | Proteobacteria | Gammaproteobacteria | Enterobacteriales |
| JX990132 | Cul_0101 | Bacteria | Proteobacteria | Gammaproteobacteria | Enterobacteriales |
| JX990133 | Cul_0102 | Bacteria | Proteobacteria | Gammaproteobacteria | Enterobacteriales |
| JX990134 | Cul_0115 | Bacteria | Proteobacteria | Gammaproteobacteria | Enterobacteriales |
| JX990135 | Cul_0116 | Bacteria | Proteobacteria | Gammaproteobacteria | Enterobacteriales |
| JX990136 | Cul_0117 | Bacteria | Actinobacteria | Actinobacteria      | Actinomycetales   |
| JX990137 | Cul_0118 | Bacteria | Actinobacteria | Actinobacteria      | Actinomycetales   |
| JX990138 | Cul_0121 | Bacteria | Proteobacteria | Gammaproteobacteria | Enterobacteriales |
| JX990139 | Cul_0126 | Bacteria | Proteobacteria | Gammaproteobacteria | Pseudomonadales   |
| JX990140 | Cul_0127 | Bacteria | Proteobacteria | Gammaproteobacteria | Enterobacteriales |
| JX990141 | Cul_0128 | Bacteria | Proteobacteria | Gammaproteobacteria | Pseudomonadales   |
| JX990142 | Cul_0130 | Bacteria | Proteobacteria | Gammaproteobacteria | Pseudomonadales   |
| JX990143 | Cul_0131 | Bacteria | Proteobacteria | Gammaproteobacteria | Enterobacteriales |
| JX990144 | Cul_0132 | Bacteria | Firmicutes     | Bacilli             | Bacillales        |
| JX990145 | Cul_0185 | Bacteria | Proteobacteria | Gammaproteobacteria | Enterobacteriales |
| JX990146 | Cul_0266 | Bacteria | Firmicutes     | Bacilli             | Bacillales        |
| JX990147 | Cul_0271 | Bacteria | Firmicutes     | Bacilli             | Bacillales        |
| JX990148 | Cul_0275 | Bacteria | Actinobacteria | Actinobacteria      | Actinomycetales   |
| JX990149 | Cul_0276 | Bacteria | Firmicutes     | Bacilli             | Bacillales        |
| JX990150 | Cul_0277 | Bacteria | Firmicutes     | Bacilli             | Bacillales        |
| JX990151 | Cul_0278 | Bacteria | Proteobacteria | Alphaproteobacteria | Rhodospirillales  |
| JX990152 | Cul_0279 | Bacteria | Firmicutes     | Bacilli             | Bacillales        |
| JX990153 | Cul_0281 | Bacteria | Actinobacteria | Actinobacteria      | Actinomycetales   |
| JX990154 | Cul_0282 | Bacteria | Firmicutes     | Bacilli             | Bacillales        |
| JX990155 | Cul_0284 | Bacteria | Firmicutes     | Bacilli             | Bacillales        |

|          |          |          |                |                     |                   |
|----------|----------|----------|----------------|---------------------|-------------------|
| JX990156 | Cul_0291 | Bacteria | Proteobacteria | Gammaproteobacteria | Enterobacteriales |
| JX990157 | Cul_0293 | Bacteria | Firmicutes     | Bacilli             | Bacillales        |
| JX990158 | Cul_0294 | Bacteria | Firmicutes     | Bacilli             | Bacillales        |
| JX990159 | Cul_0296 | Bacteria | Proteobacteria | Gammaproteobacteria | Enterobacteriales |
| JX990160 | Cul_0298 | Bacteria | Proteobacteria | Gammaproteobacteria | Enterobacteriales |
| JX990161 | Cul_0299 | Bacteria | Proteobacteria | Alphaproteobacteria | Rhodospirillales  |
| JX990162 | Cul_0301 | Bacteria | Firmicutes     | Bacilli             | Bacillales        |
| JX990163 | Cul_0304 | Bacteria | Firmicutes     | Bacilli             | Bacillales        |
| JX990164 | Cul_0305 | Bacteria | Firmicutes     | Bacilli             | Bacillales        |
