# Supplementary material
Source: PubMed Central journal article supplement (PMC3553759)
Supplement: AEM.03107-12_zam999104008so6.pdf [file AEM.03107-12_zam999104008so6.pdf]

Table S3. RDP Library Compare results for 454 and clone libraries.

| Bacterial order    | CSM1235-gut     | CSM1280-head-2  | CSM1280-crop-2  | CSM1280-midgut-2 | CSM1280-hindgut-2 |
|--------------------|-----------------|-----------------|-----------------|------------------|-------------------|
| Rhizobiales        | 2.44E-02        | 4.70E-02        | N/A             | N/A              | 7.09E-01          |
| Opitutales         | <b>8.00E-05</b> | 2.85E-01        | N/A             | <b>7.58E-03</b>  | 7.49E-02          |
| Burkholderiales    | <b>1.08E-05</b> | 1.98E-01        | N/A             | 1.93E-01         | 1.68E-01          |
| Xanthomonadales    | N/A             | <b>6.00E-14</b> | <b>9.94E-05</b> | <b>3.83E-03</b>  | <b>6.00E-14</b>   |
| Campylobacteriales | N/A             | <b>3.82E-05</b> | N/A             | 1.35E-02         | 4.78E-01          |
| Flavobacteriales   | N/A             | 9.74E-02        | N/A             | N/A              | N/A               |
| Alteromonadales    | N/A             | N/A             | N/A             | N/A              | N/A               |
| Sphingobacteriales | N/A             | N/A             | N/A             | N/A              | N/A               |
| Oceanospirillales  | N/A             | N/A             | N/A             | N/A              | N/A               |
| Pseudomonadales    | N/A             | N/A             | N/A             | N/A              | N/A               |
| Actinobacteridae   | 3.68E-01        | N/A             | N/A             | N/A              | N/A               |
| Lactobacillales    | N/A             | N/A             | N/A             | N/A              | N/A               |
| Entomoplasmatales  | <b>1.93E-06</b> | N/A             | N/A             | N/A              | N/A               |

P-values on the level of bacterial orders are given. Significantly differing ( $p < 0.01$ ) orders in 454 libraries and Sanger sequenced clone libraries according to RDP library compare are indicated in boldface.

Table S3. Continued.

| Bacterial order    | CSM1280-wk-1    | CSM1280-head-3  | CSM1280-crop-3  | CSM1280-midgut-3 | CSM1280-hindgut-3 |
|--------------------|-----------------|-----------------|-----------------|------------------|-------------------|
| Rhizobiales        | <b>9.00E-04</b> | 4.70E-02        | 1.01E-02        | 5.16E-01         | 5.57E-01          |
| Opitutales         | <b>1.60E-04</b> | 2.85E-01        | 4.98E-01        | 1.10E-01         | 2.14E-02          |
| Burkholderiales    | 1.68E-02        | 1.98E-01        | <b>6.14E-03</b> | 4.77E-02         | 1.24E-02          |
| Xanthomonadales    | <b>6.00E-14</b> | <b>6.00E-14</b> | <b>6.00E-14</b> | <b>1.51E-09</b>  | <b>6.38E-03</b>   |
| Campylobacteriales | 6.60E-01        | <b>3.82E-05</b> | N/A             | 1.96E-01         | 1.07E-01          |
| Flavobacteriales   | N/A             | 9.74E-02        | 3.29E-02        | N/A              | 7.92E-01          |
| Alteromonadales    | N/A             | N/A             | N/A             | N/A              | N/A               |
| Sphingobacteriales | N/A             | N/A             | N/A             | N/A              | 9.33E-02          |
| Oceanospirillales  | N/A             | N/A             | N/A             | N/A              | N/A               |
| Pseudomonadales    | N/A             | N/A             | N/A             | N/A              | N/A               |
| Actinobacteridae   | N/A             | N/A             | N/A             | N/A              | N/A               |
| Lactobacillales    | N/A             | N/A             | 9.95E-01        | N/A              | <b>3.03E-03</b>   |
| Entomoplasmatales  | N/A             | N/A             | N/A             | N/A              | N/A               |

P-values on the level of bacterial orders are given. Significantly differing ( $p < 0.01$ ) orders in 454 libraries and Sanger sequenced clone libraries according to RDP library compare are indicated in boldface.

Table S3. Continued.

| Bacterial order    | CSM1323-3 guts  | CSM1323-3 heads | CSM1323 3 legs |
|--------------------|-----------------|-----------------|----------------|
| Rhizobiales        | N/A             | N/A             | N/A            |
| Opitutales         | 6.26E-02        | N/A             | N/A            |
| Burkholderiales    | 1.53E-01        | N/A             | N/A            |
| Xanthomonadales    | N/A             | N/A             | N/A            |
| Campylobacteriales | N/A             | N/A             | N/A            |
| Flavobacteriales   | <b>3.04E-05</b> | N/A             | N/A            |
| Alteromonadales    | N/A             | N/A             | N/A            |
| Sphingobacteriales | N/A             | N/A             | N/A            |
| Oceanospirillales  | N/A             | N/A             | N/A            |
| Pseudomonadales    | N/A             | N/A             | N/A            |
| Actinobacteridae   | N/A             | N/A             | N/A            |
| Lactobacillales    | N/A             | N/A             | N/A            |
| Entomoplasmatales  | 2.64E-01        | 6.21E-01        | 4.93E-01       |

P-values on the level of bacterial orders are given. Significantly differing ( $p < 0.01$ ) orders in 454 libraries and Sanger sequenced clone libraries according to RDP library compare are indicated in boldface.
